# Supplementary material for: Synthesis, structure, ionochromic and cytotoxic properties of new 2-(indolin-2-yl)-1,3-tropolones
Source: publisher site journal article supplement (doi:10.3762/bjoc.21.26), 2025-02-17
Supplement: Additional file 1 [file 1860-5397-21-26-S1.pdf]

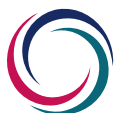

## Supporting Information

for

### **Synthesis, structure, ionochromic and cytotoxic properties of new 2-(indolin-2-yl)-1,3-tropolones**

Yurii A. Sayapin, Eugeny A. Gusakov, Inna O. Tupaeva, Alexander D. Dubonosov, Igor V. Dorogan, Valery V. Tkachev, Anna S. Goncharova, Gennady V. Shilov, Natalia S. Kuznetsova, Svetlana Y. Filippova, Tatyana A. Krasnikova, Yanis A. Bumber, Alexey Y. Maksimov, Sergey M. Aldoshin and Vladimir I. Minkin

*Beilstein J. Org. Chem.* **2025**, *21*, 358–368. doi:10.3762/bjoc.21.26

### **Experimental procedures and characterization data for all novel compounds 7a, 7b, 8a and 8b**

## Synthesis

2-(1,1-Dimethyl-1*H*-benzo[*e*]indolin-2-yl)-5,6,7-trichloro-1,3-tropolone (**7a**).

A solution of 1,1,2-trimethyl-1*H*-benzo[*e*]indoline (**2a**, 1.05 g, 5 mmol) and *o*-chloranil (**3**, 1.23 g, 5 mmol) in dioxane (10 mL) was refluxed for 1.5 h. The solvent was removed *in vacuo* and the residue was dissolved in methylene chloride. The solution was purified by silica gel column chromatography with hexane/CH<sub>2</sub>Cl<sub>2</sub> 1:2. The yellow-orange fraction of **7a** with *R<sub>f</sub>* 0.4 was collected and recrystallized from *n*-hexane. Orange crystals. Yield 30%, mp 164-165 °C (*n*-hexane). <sup>1</sup>H NMR (DMSO-*d*<sub>6</sub>) δ (ppm), *J*/Hz: 1.85 (s, 6H, 2Me), 7.10 (s, 1H, H<sup>4</sup>), 7.51 (t, 1H, H<sub>Ar</sub>, *J* = 7.8), 7.63 (t, 1H, H<sub>Ar</sub>, *J* = 7.8), 7.94 (d, 1H, H<sub>Ar</sub>, *J* = 8.4), 7.97 (d, 1H, H<sub>Ar</sub>, *J* = 8.4) 8.02 (d, 1H, H<sub>Ar</sub>, *J* = 7.8), 8.17 (d, 1H, H<sub>Ar</sub>, *J* = 8.4), 14.23 (s, 1H, OH). <sup>13</sup>C NMR (DMSO-*d*<sub>6</sub>) δ (ppm): 22.9, 53.6, 111.7, 114.2, 122.4, 125.0, 127.0, 127.4, 128.0, 129.8, 129.8, 130.6, 132.0, 134.0, 134.4, 134.8, 136.6, 178.3, 182.5, 182.7. <sup>1</sup>H NMR (CDCl<sub>3</sub>) δ (ppm), *J*/Hz: 1.98 (s, 6H, 2Me), 6.92 (s, 1H, H<sup>4</sup>), 7.45 (d, 1H, H<sub>Ar</sub>, *J* = 9), 7.51 (t, 1H, H<sub>Ar</sub>, *J* = 7.8), 7.64 (t, 1H, H<sub>Ar</sub>, *J* = 8.4), 7.89 (d, 1H, H<sub>Ar</sub>, *J* = 8.4), 7.96 (d, 1H, H<sub>Ar</sub>, *J* = 8.4), 8.09 (d, 1H, H<sub>Ar</sub>, *J* = 8.4), 15.15 (br. s, 1H, OH). <sup>13</sup>C NMR (CDCl<sub>3</sub>) δ (ppm): 14.1, 23.4, 31.6, 54.6, 112.7, 122.5, 125.3, 127.6, 127.9, 130.1, 130.3, 132.6, 133.5, 135.0, 135.9, 180.7. IR (ν, cm<sup>-1</sup>): 3040, 2975, 2934, 2867, 1736, 1638, 1536, 1520, 1494, 1466, 1442, 1399, 1372, 1364, 1323, 1261, 1215, 1207, 1174, 1082, 1057, 945, 907, 874, 856, 815, 788, 763, 748, 689. ESI-MS, *m/z* (rel. int.): 419 (44) [M<sup>+</sup>], 417 (44), 389 (66), 378 (27), 374 (82), 353 (17), 339 (60), 304 (18), 275 (24), 241 (35), 194 (72), 191 (26), 165 (60), 152 (100), 147 (26), 139 (30), 127 (35), 121 (35), 115 (21), 106 (16), 87 (12), 84 (21), 77 (15), 63 (23). Anal. Calcd (%) for C<sub>21</sub>H<sub>14</sub>Cl<sub>3</sub>NO<sub>2</sub>: C, 60.24; H, 3.37; N, 3.35. Found (%): C, 60.12; H, 3.20; N, 3.22.

(2-(3,3-Dimethyl-3*H*-benzo[*g*]indolin-2-yl)-5,6,7-trichloro-1,3-tropolone (**7b**).

A solution of 2,3,3-trimethyl-3*H*-benzo[*g*]indoline (**2b**, 1.05 g, 5 mmol) and *o*-chloranil (**3**, 1.23 g, 5 mmol) in dioxane (10 mL) was refluxed for 1.5 h. The solvent was removed *in vacuo* and the residue was dissolved in methylene chloride. The solution was purified by silica gel column chromatography with hexane/CH<sub>2</sub>Cl<sub>2</sub> 1:1. The orange fraction of **7b** with *R<sub>f</sub>* 0.4 was collected and recrystallized from *n*-hexane. Orange crystals. Yield 28%, mp 209-210 °C (*n*-hexane). <sup>1</sup>H NMR (CDCl<sub>3</sub>) δ (ppm), *J*/Hz: 1.75 (s, 6H, 2Me), 6.93 (s, 1H, H<sup>4</sup>), 7.44 (d, 1H, H<sub>Ar</sub>, *J* = 8.4), 7.54 (t, 1H, H<sub>Ar</sub>, *J* = 7.8), 7.63 (t, 1H, H<sub>Ar</sub>, *J* = 8.4), 7.78 (d, 1H, H<sub>Ar</sub>, *J* = 8.4), 7.91 (d, 1H, H<sub>Ar</sub>, *J* = 8.4), 7.98 (d, 1H, H<sub>Ar</sub>, *J* = 7.8), 15.76 (br. s, 1H, OH). <sup>13</sup>C NMR (CDCl<sub>3</sub>) δ (ppm): 25.4, 53.6, 112.4, 115.1, 122.3, 124.4, 126.8, 127.2, 128.0, 128.2, 129.0, 129.9, 130.1, 130.3, 130.8, 132.0, 133.4, 134.2, 135.4, 136.9, 140.0, 177.1, 191.0, 196.4. IR (ν, cm<sup>-1</sup>): 3277, 3058, 3001, 2980, 2938, 2870, 1649, 1558, 1503, 1469, 1377, 1369, 1318, 1294, 1256, 1205, 1095, 1055, 944, 895, 866, 820, 790, 763, 747, 699, 686. ESI-MS, *m/z* (rel. int.): 419 (7) [M<sup>+</sup>], 417 (7), 391 (13), 389 (13), 376 (20), 374 (20), 341 (12), 339 (18), 304 (10), 275 (13), 240 (25), 238 (10), 220 (16), 204 (14), 194 (51), 191 (39), 178 (19), 165 (92), 156 (22), 152 (100), 149 (52), 147 (77), 139 (48), 131 (15), 127 (43), 121 (53), 119 (74), 115 (41), 107 (15), 102 (16), 86 (32), 84 (75), 77 (45), 65 (24), 63 (77), 51 (26). Anal. Calcd (%) for C<sub>21</sub>H<sub>14</sub>Cl<sub>3</sub>NO<sub>2</sub>: C, 60.24; H, 3.37; N, 3.35. Found (%): C, 60.10; H, 3.24; N, 3.20.

2-(1,1-Dimethyl-1*H*-benzo[*e*]indolin-2-yl)-4,5,6,7-tetrachloro-1,3-tropolone (**8a**).

A solution of 1,1,2-trimethyl-1*H*-benzo[*e*]indoline (**2a**, 1.05 g, 5 mmol) and *o*-chloranil (**3**, 2.46 g, 10 mmol) in AcOH (10 mL) was kept at 50–60 °C for 20 h. The solution was diluted with water and extracted with chloroform (2 × 50 mL). The chloroform solution was washed in a separating funnel with water (3 × 50 mL) and then dried for 2 h with anhydrous Na<sub>2</sub>SO<sub>4</sub>. The solvent was removed *in vacuo*, the residue was purified by silica gel column chromatography with hexane/CH<sub>2</sub>Cl<sub>2</sub> 1:1. The yellow fraction of **8a** with R<sub>f</sub> 0.9 was collected and recrystallized from *n*-hexane. Bright yellow crystals. Yield 26%, mp 226-227 °C (*n*-hexane). <sup>1</sup>H NMR (CDCl<sub>3</sub>) δ (ppm), *J*/Hz: 1.99 (s, 6H, 2Me), 7.42 (d, 1H, H<sub>Ar</sub>, *J* = 8.4), 7.53 (t, 1H, H<sub>Ar</sub>, *J* = 7.8), 7.65 (t, 1H, H<sub>Ar</sub>, *J* = 8.4), 7.91 (d, 1H, H<sub>Ar</sub>, *J* = 8.4), 7.97 (d, 1H, H<sub>Ar</sub>, *J* = 8.4), 8.08 (d, 1H, H<sub>Ar</sub>, *J* = 8.6), 14.29 (br. s, 1H, OH). <sup>13</sup>C NMR (CDCl<sub>3</sub>) δ (ppm): 14.1, 22.6, 23.1, 54.5, 112.1, 112.5, 122.4, 125.4, 127.7, 127.9, 130.2, 130.5, 132.7, 134.7, 135.6, 179.0. IR (ν, cm<sup>-1</sup>): 3128, 3058, 2973, 2929, 2869, 1666, 1626, 1599, 1561, 1524, 1495, 1471, 1443, 1380, 1366, 1345, 1246, 1213, 1129, 1105, 1067, 962, 940, 924, 867, 813, 803, 773, 752, 740, 696. ESI-MS, *m/z* (rel. int.): 453 (80) [M+], 424 (27), 416 (17), 402 (100), 389 (22), 380 (17), 374 (21), 338 (22), 309 (15), 275 (30), 238 (23), 220 (17), 194 (69), 190 (29), 165 (55), 155 (27), 152 (63), 139 (22), 126 (25), 120 (23), 118 (17), 115 (17), 111 (12), 106 (12), 87 (10), 63 (12). Anal. Calcd (%) for C<sub>21</sub>H<sub>13</sub>Cl<sub>4</sub>NO<sub>2</sub>: C, 55.66; H, 2.89; N, 3.09. Found (%): C, 55.44; H, 2.66; N, 2.90.

(2-(3,3-Dimethyl-3*H*-benzo[*g*]indolin-2-yl)-4,5,6,7-tetrachloro-1,3-tropolone (**8b**).

A solution of 2,3,3-trimethyl-3*H*-benzo[*g*]indoline (**2b**, 1.05 g, 5 mmol) and *o*-chloranil (**3**, 2.46 g, 10 mmol) in AcOH (10 mL) was kept at 60 °C for 72 h. The solution was diluted with water and extracted with chloroform (2 × 50 mL). The chloroform solution was washed in a separating funnel with water (3 × 50 mL) and then dried for 2 h with anhydrous Na<sub>2</sub>SO<sub>4</sub>. The solvent was removed *in vacuo*, the residue was purified by silica gel column chromatography with hexane/CH<sub>2</sub>Cl<sub>2</sub> 1:1. The yellow-orange fraction of **8b** with R<sub>f</sub> 0.8 was collected and recrystallized from *n*-hexane. Bright yellow crystals. Yield 24%, mp 152-153 °C (*n*-hexane). IR (ν, cm<sup>-1</sup>): 3312, 3007, 2979, 2933, 2872, 1665, 1578, 1561, 1544, 1495, 1466, 1445, 1396, 1370, 1322, 1279, 1249, 1219, 1207, 1071, 1037, 980, 898, 869, 823, 798, 777, 756, 688, 675. <sup>1</sup>H NMR (CDCl<sub>3</sub>) δ (ppm), *J*/Hz: 1.75 (s, 6H, 2Me), 7.44 (d, 1H, H<sub>Ar</sub>, *J* = 7.8), 7.55 (t, 1H, H<sub>Ar</sub>, *J* = 7.8), 7.63 (t, 1H, H<sub>Ar</sub>, *J* = 8.4), 7.79 (d, 1H, H<sub>Ar</sub>, *J* = 8.4), 7.92 (d, 1H, H<sub>Ar</sub>, *J* = 8.4), 7.98 (d, 1H, H<sub>Ar</sub>, *J* = 8.4), 14.84 (br. s, 1H, OH). <sup>13</sup>C NMR (CDCl<sub>3</sub>) δ (ppm): 23.8, 53.7, 112.9, 119.2, 120.6, 120.7, 126.7, 126.9, 127.5, 128.8, 133.5, 133.7, 138.4, 177.9. ESI-MS, *m/z* (rel. int.): 453 (76) [M<sup>+</sup>], 424 (17), 416 (14), 402 (100), 400 (98), 389 (15), 380 (16), 373 (19), 338 (27), 309 (15), 275 (36), 238 (27), 220 (27), 207 (18), 194 (85), 190 (48), 180 (21), 165 (89), 155 (42), 152 (86), 139 (38), 137 (25), 126 (41), 120 (42), 118 (29), 115 (29), 111 (22), 106 (16), 87 (17), 77 (17), 63 (24), 57 (17). Anal. Calcd (%) for C<sub>21</sub>H<sub>13</sub>Cl<sub>4</sub>NO<sub>2</sub>: C, 55.66; H, 2.89; N, 3.09. Found (%): C, 55.48; H, 2.70; N, 2.88.
