# Supplementary material for: Synthesis, structure, ionochromic and cytotoxic properties of new 2-(indolin-2-yl)-1,3-tropolones
Source: publisher site journal article supplement (doi:10.3762/bjoc.21.26), 2025-02-17
Supplement: Additional file 2 [file 1860-5397-21-26-S2.pdf]

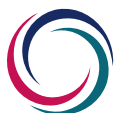

## Supporting Information

for

### Synthesis, structure, ionochromic and cytotoxic properties of new 2-(indolin-2-yl)-1,3-tropolones

Yurii A. Sayapin, Eugeny A. Gusakov, Inna O. Tupaeva, Alexander D. Dubonosov, Igor V. Dorogan, Valery V. Tkachev, Anna S. Goncharova, Gennady V. Shilov, Natalia S. Kuznetsova, Svetlana Y. Filippova, Tatyana A. Krasnikova, Yanis A. Bumber, Alexey Y. Maksimov, Sergey M. Aldoshin and Vladimir I. Minkin

*Beilstein J. Org. Chem.* **2025**, *21*, 358–368. doi:10.3762/bjoc.21.26

### <sup>1</sup>H, <sup>13</sup>C NMR, IR and HRMS spectra of all novel compounds

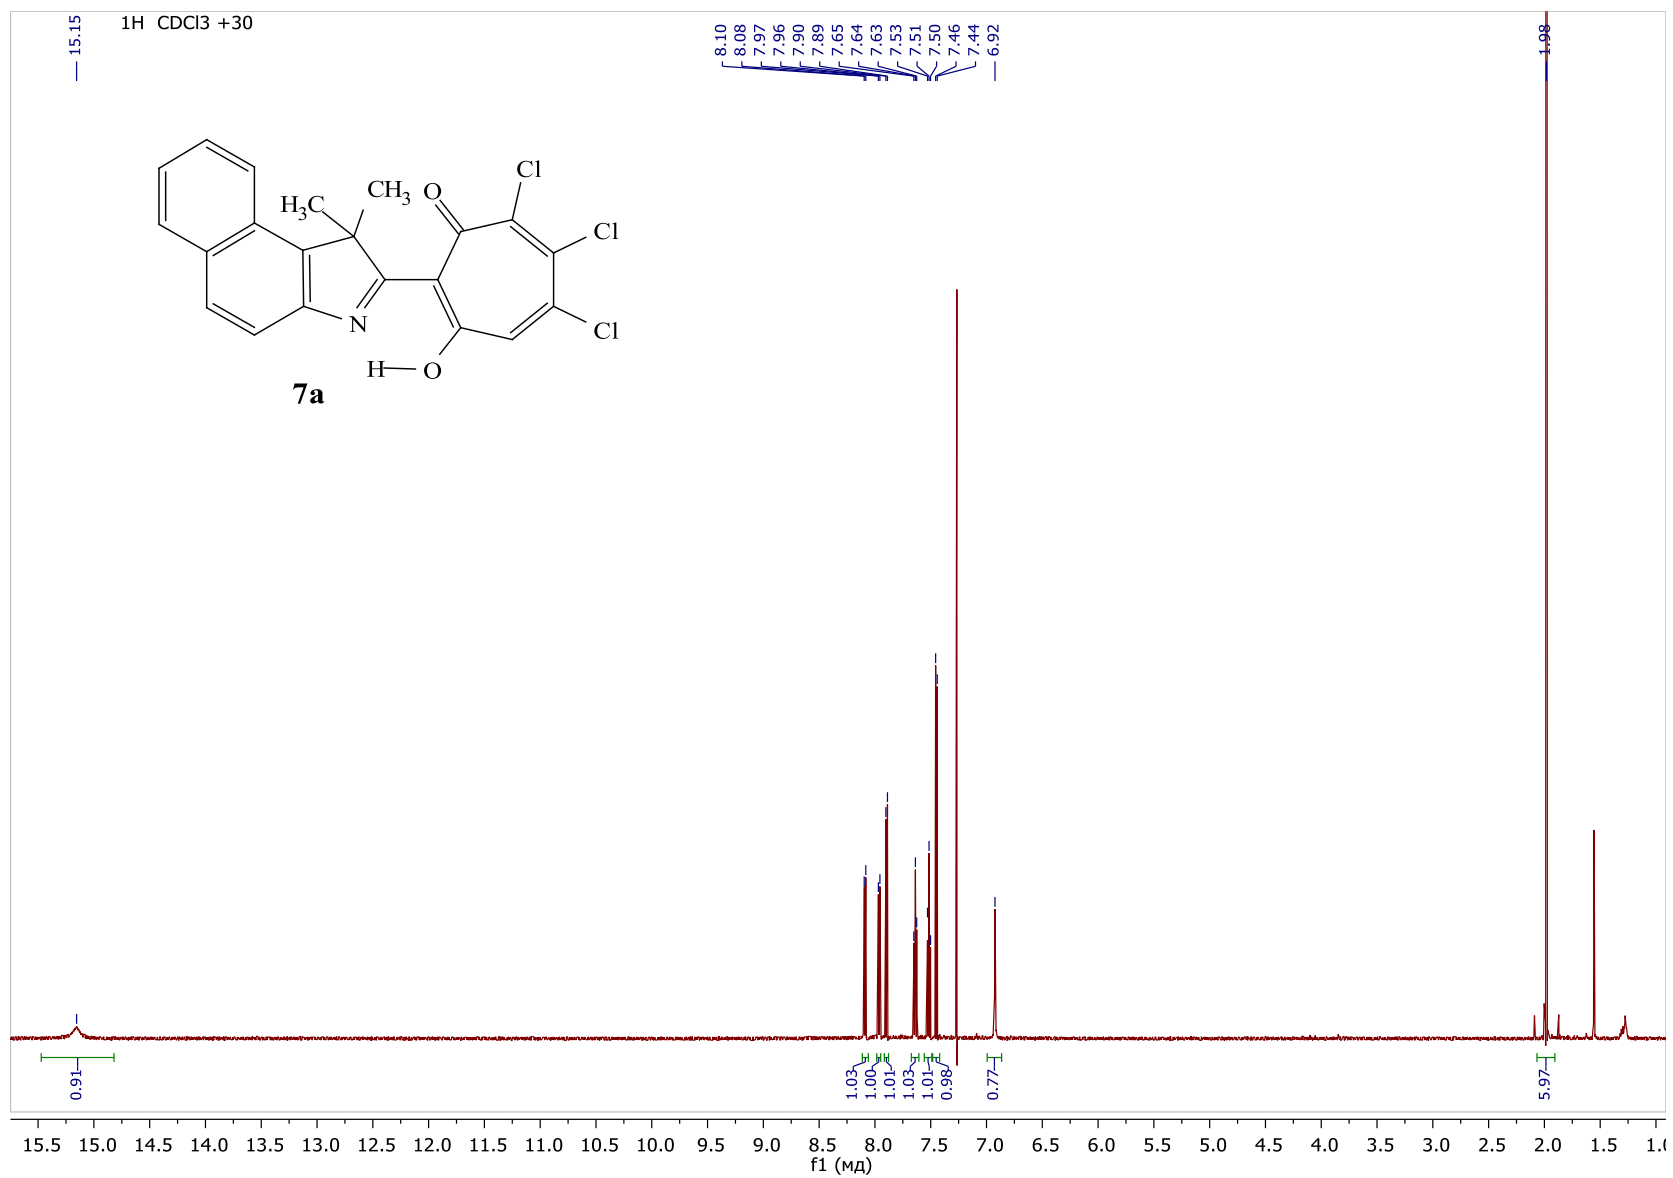

**Figure S1.** <sup>1</sup>H NMR spectrum of compound **7a** in CDCl<sub>3</sub>.

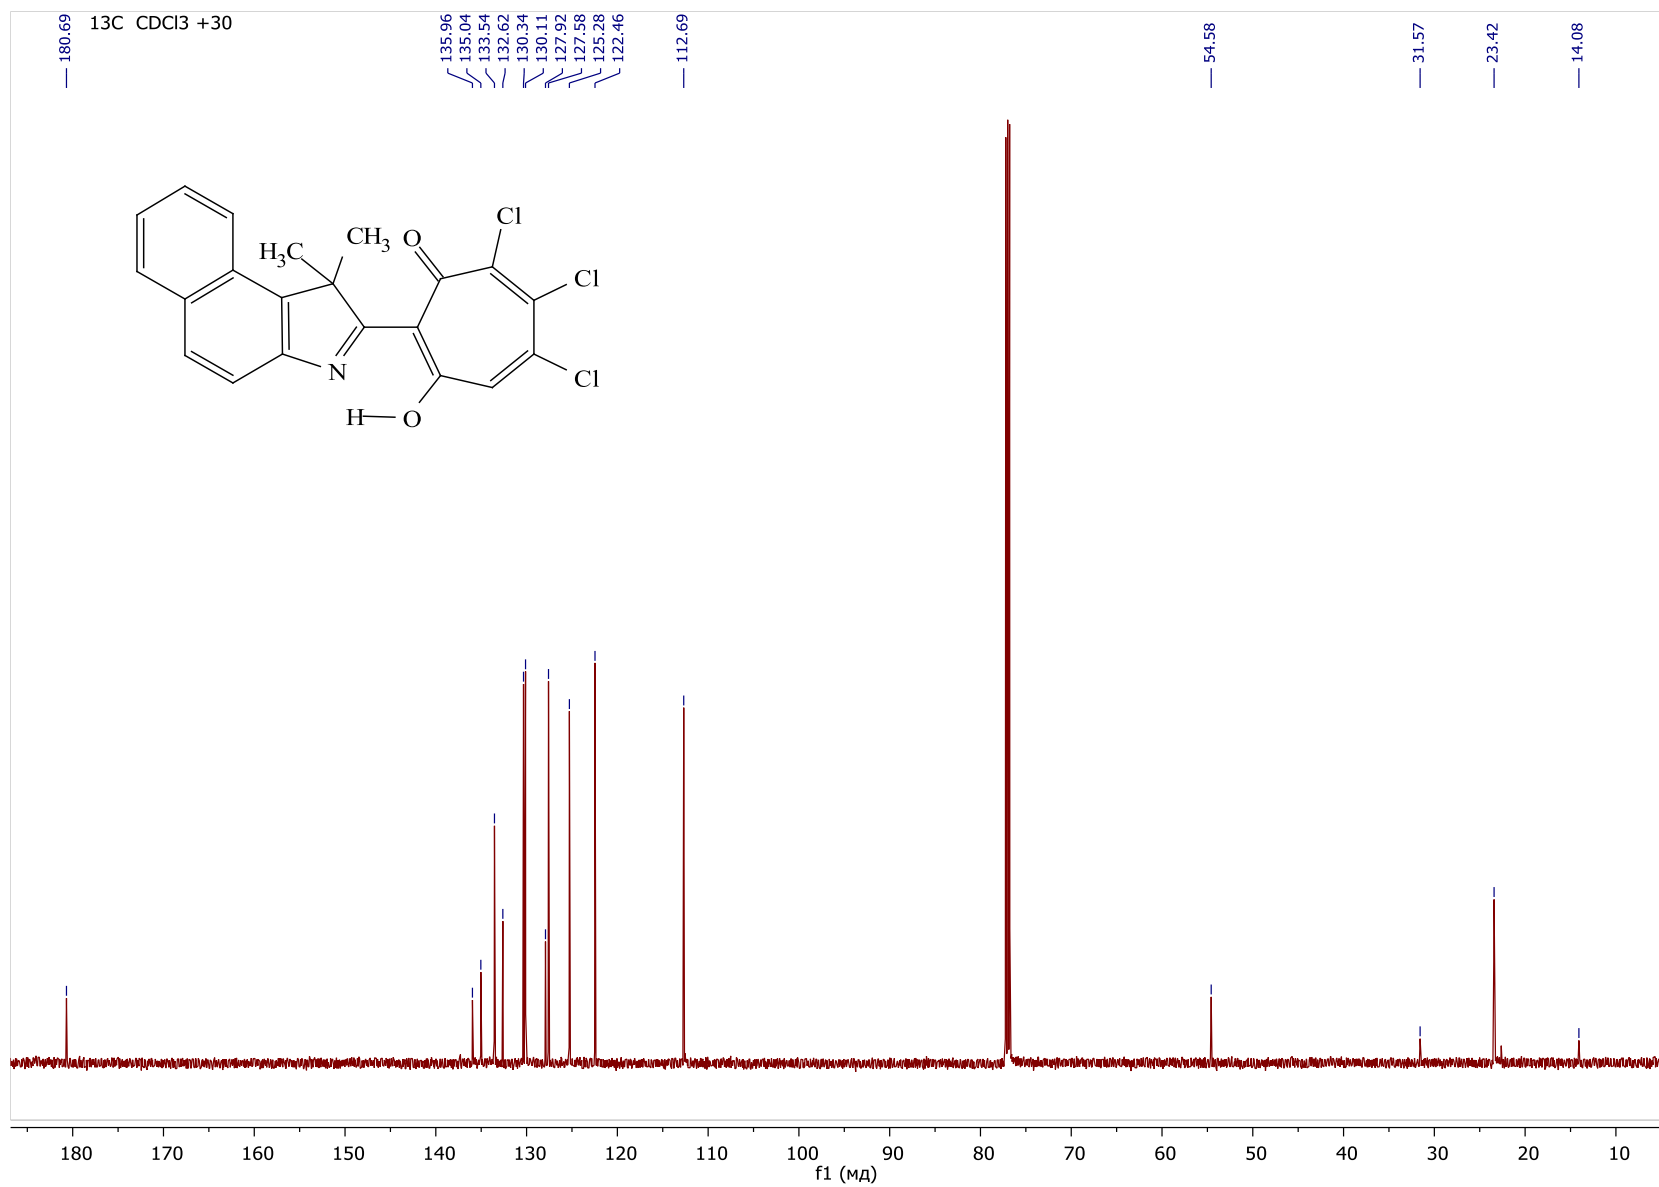

**Figure S2.** <sup>13</sup>C NMR spectrum of compound **7a** in CDCl<sub>3</sub>.

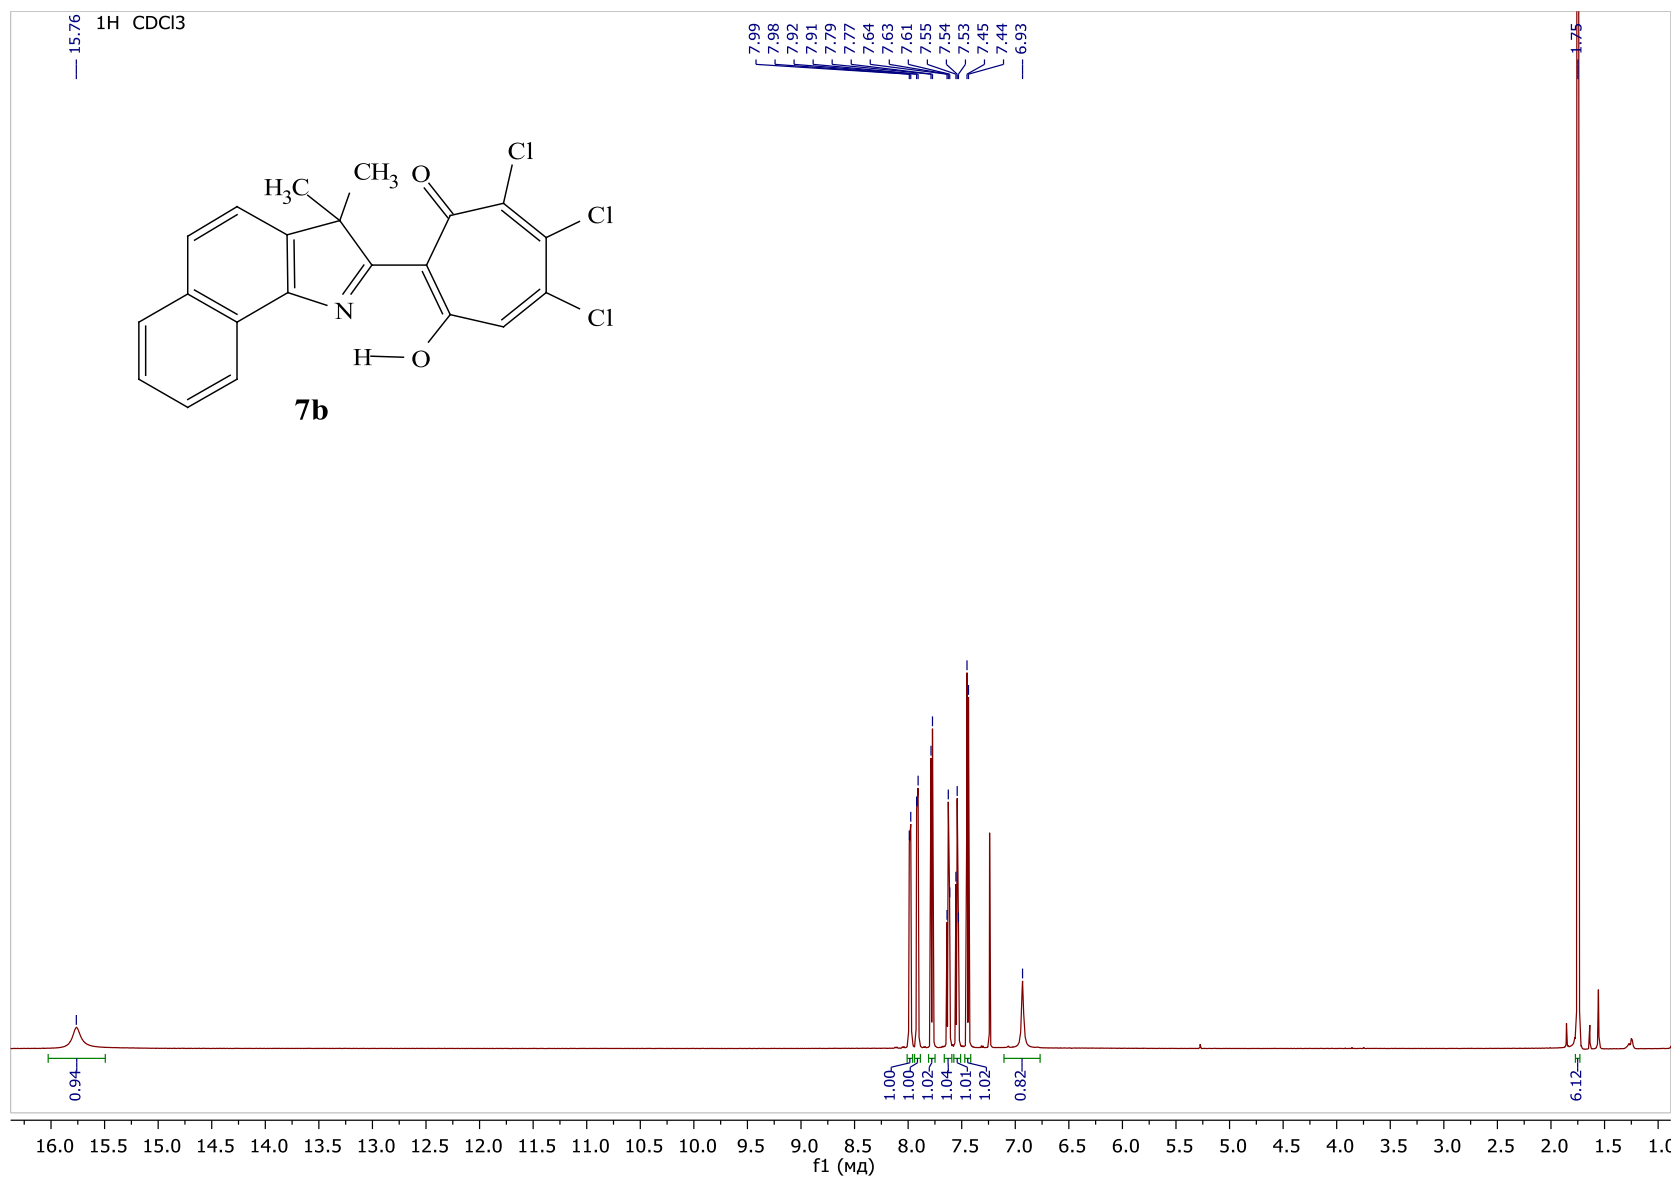

**Figure S3.** <sup>1</sup>H NMR spectrum of compound **7b** in CDCl<sub>3</sub>.

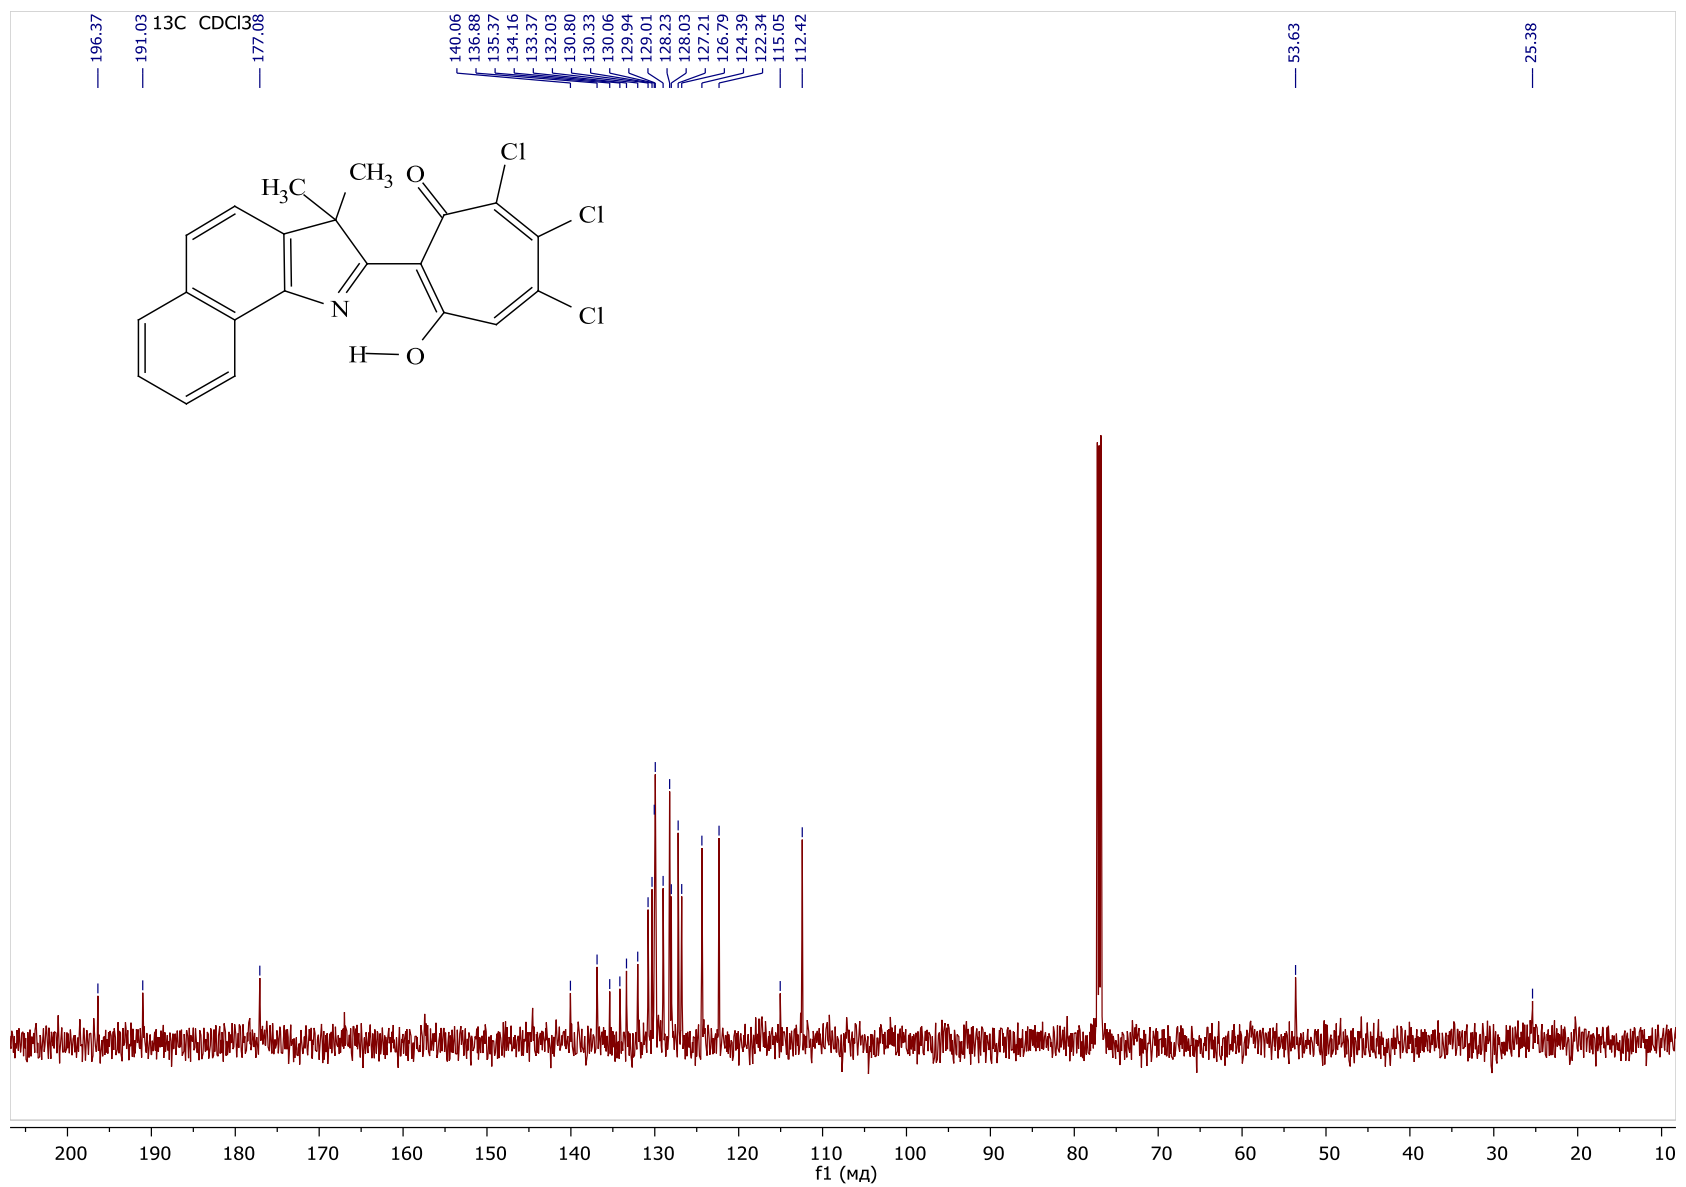

**Figure S4.**  $^{13}\text{C}$  NMR spectrum of compound **7b** in  $\text{CDCl}_3$ .

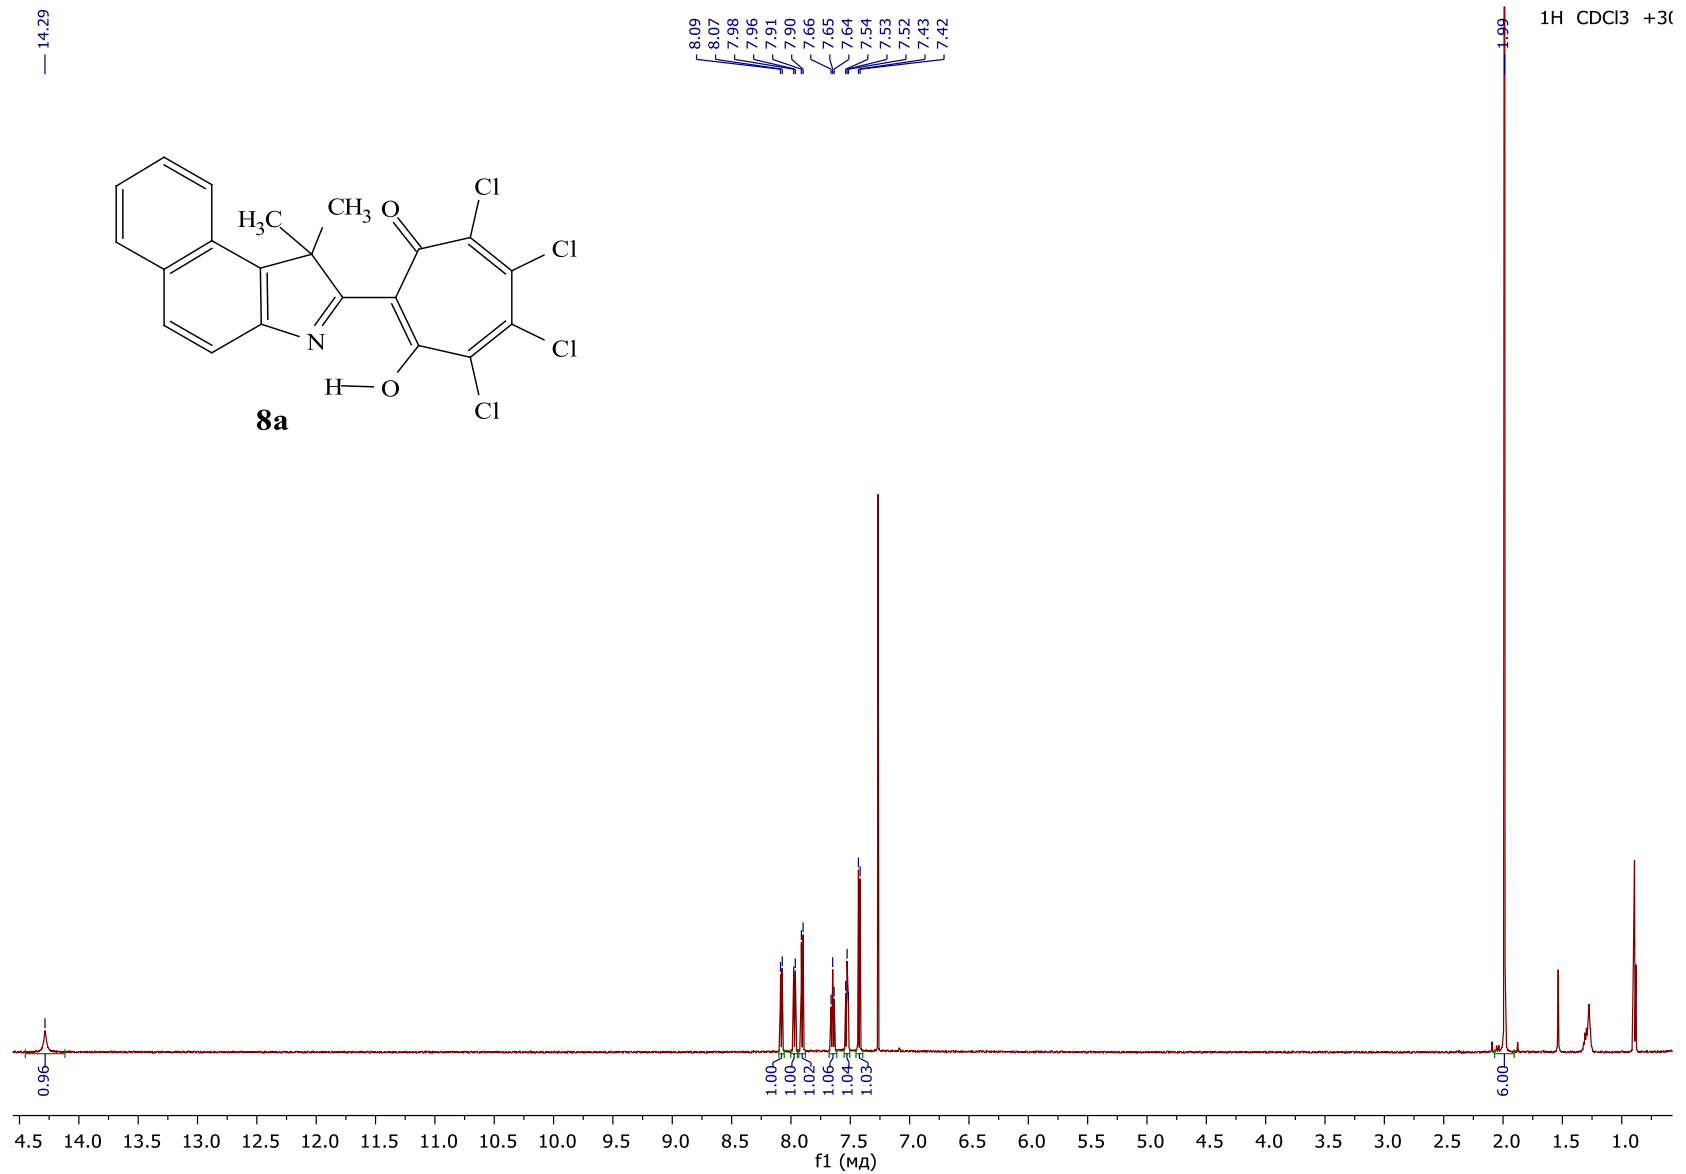

**Figure S5.** <sup>1</sup>H NMR spectrum of compound **8a** in CDCl<sub>3</sub>.

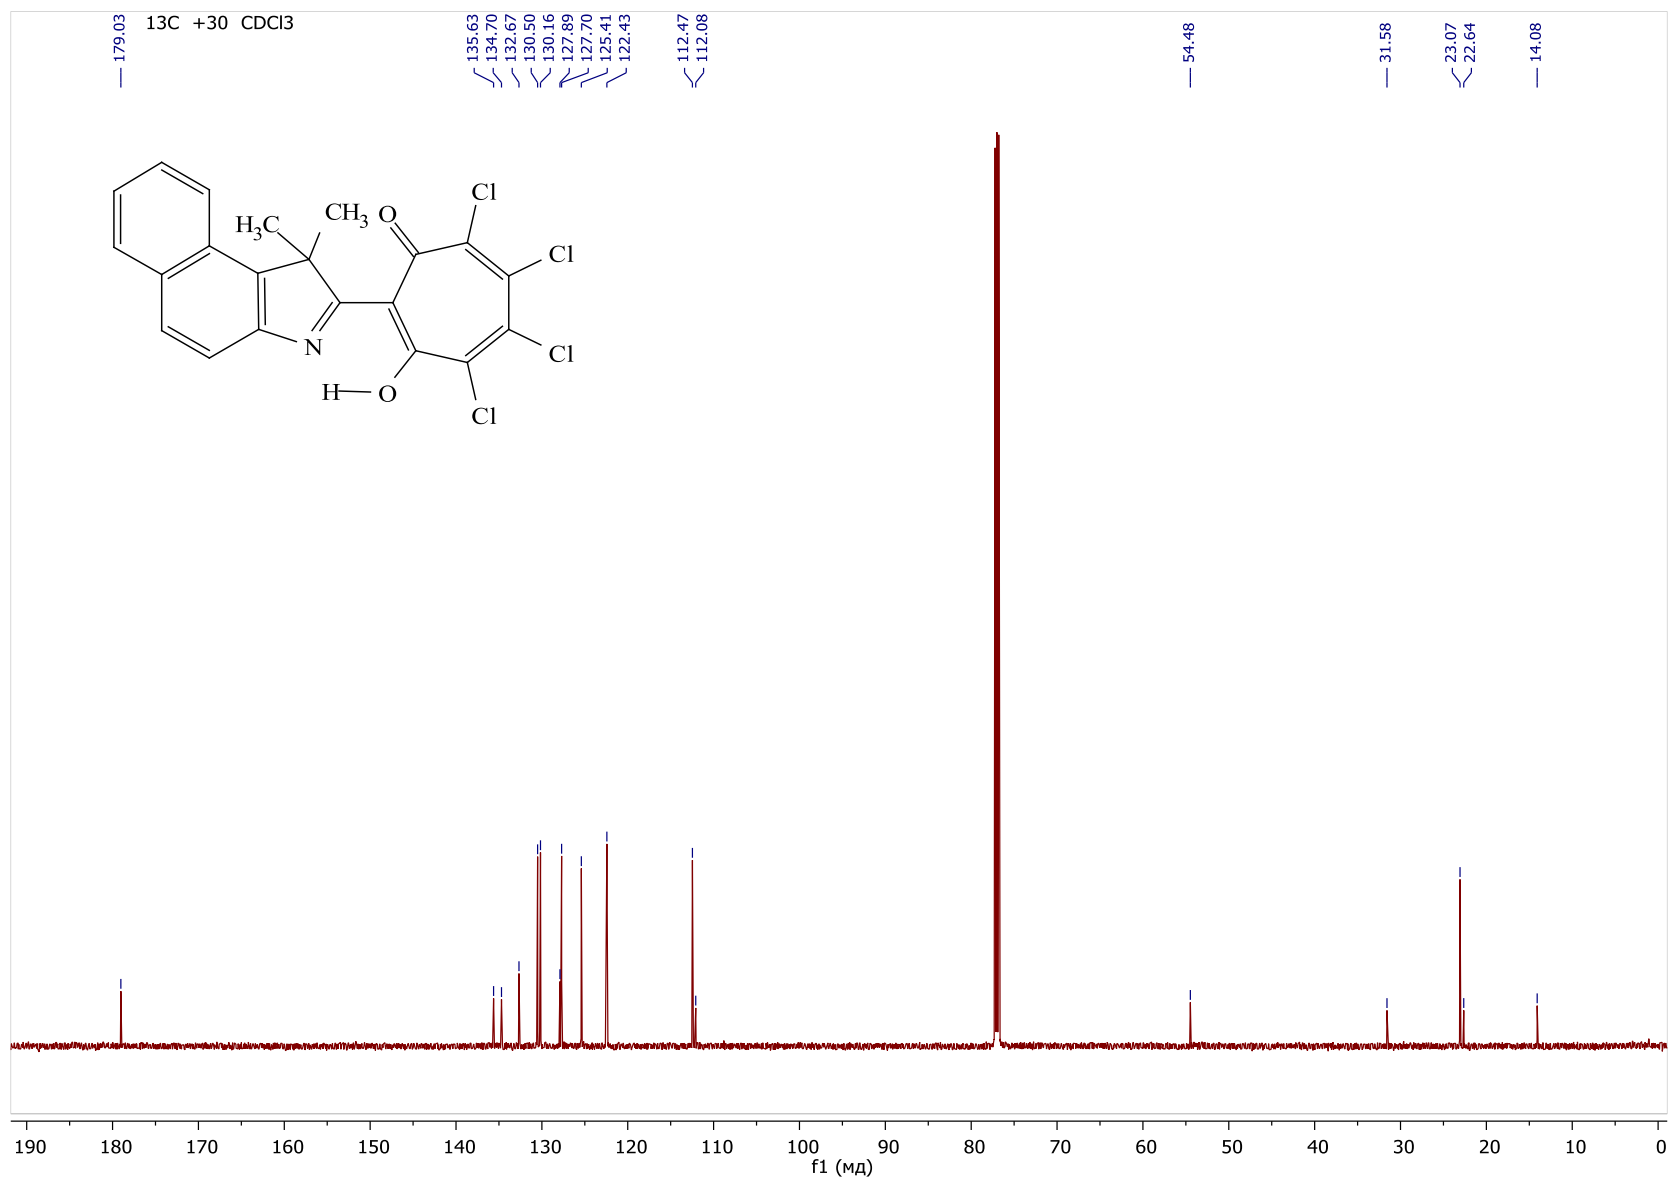

Figure S6.  $^{13}\text{C}$  NMR spectrum of compound **8a** in  $\text{CDCl}_3$ .

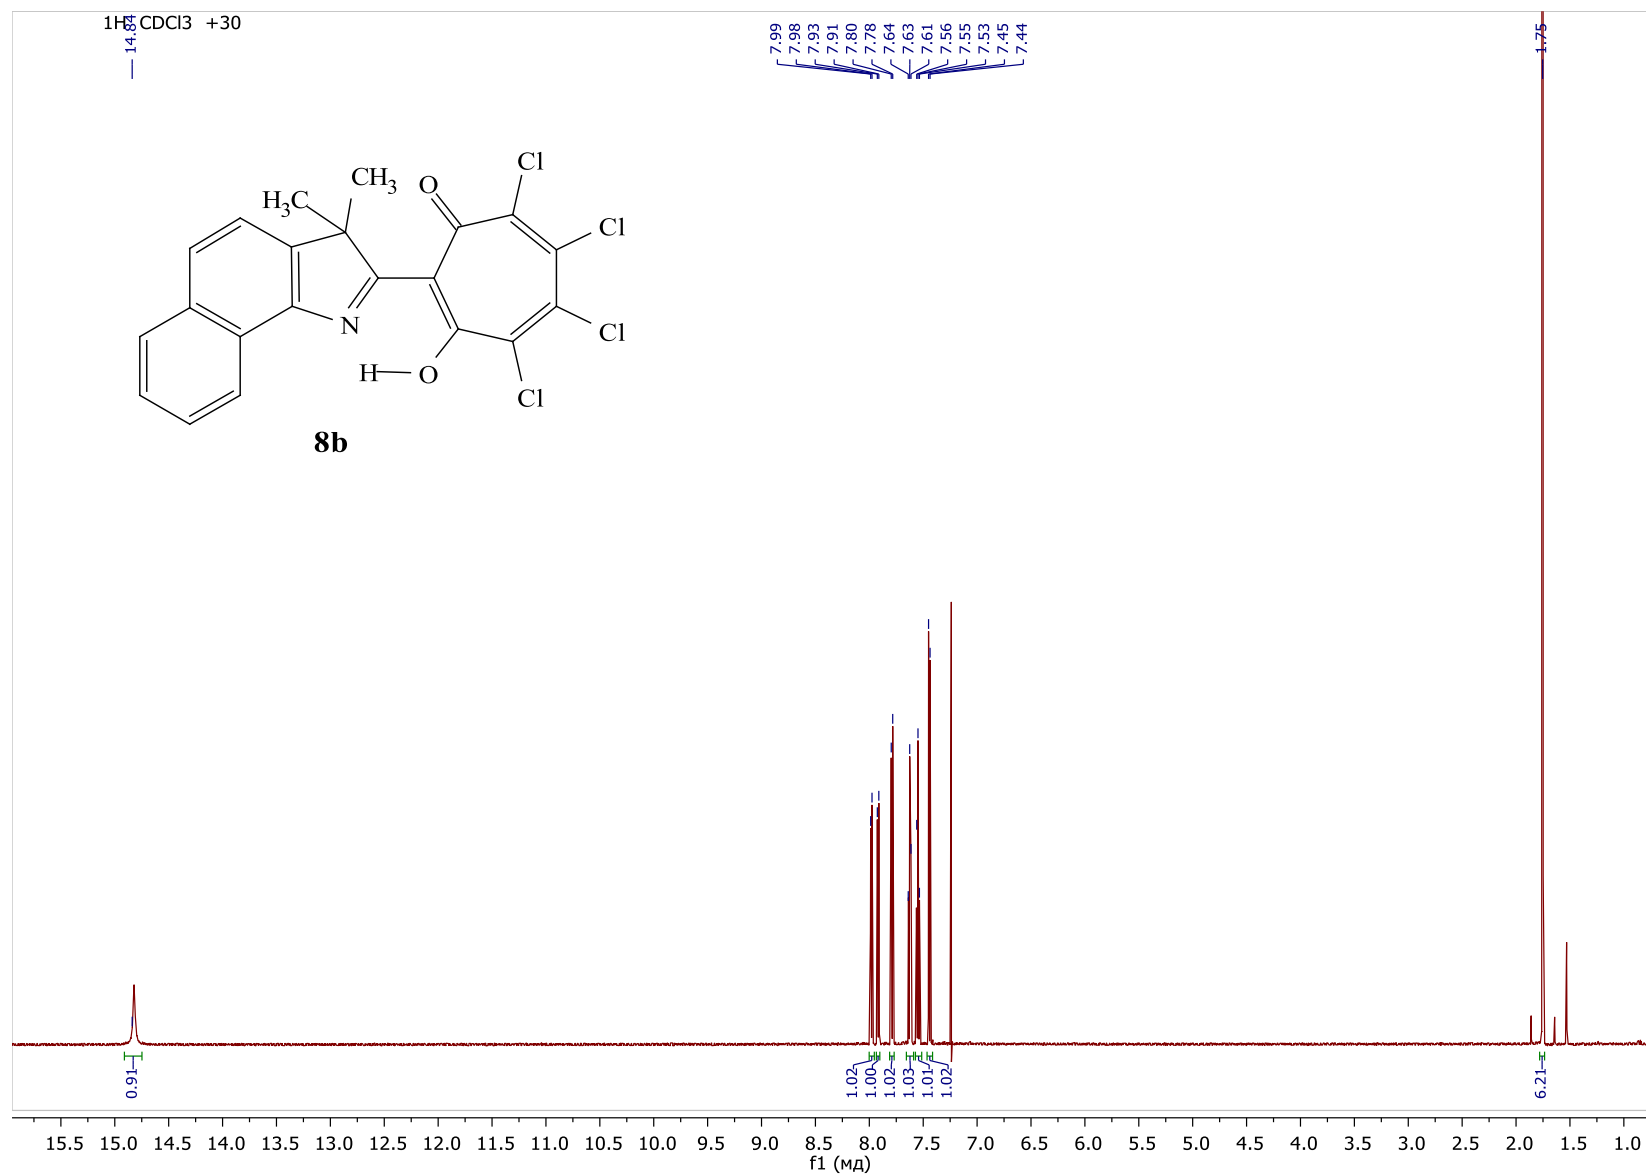

**Figure S7.**  $^1\text{H}$  NMR spectrum of compound **8b** in  $\text{CDCl}_3$ .



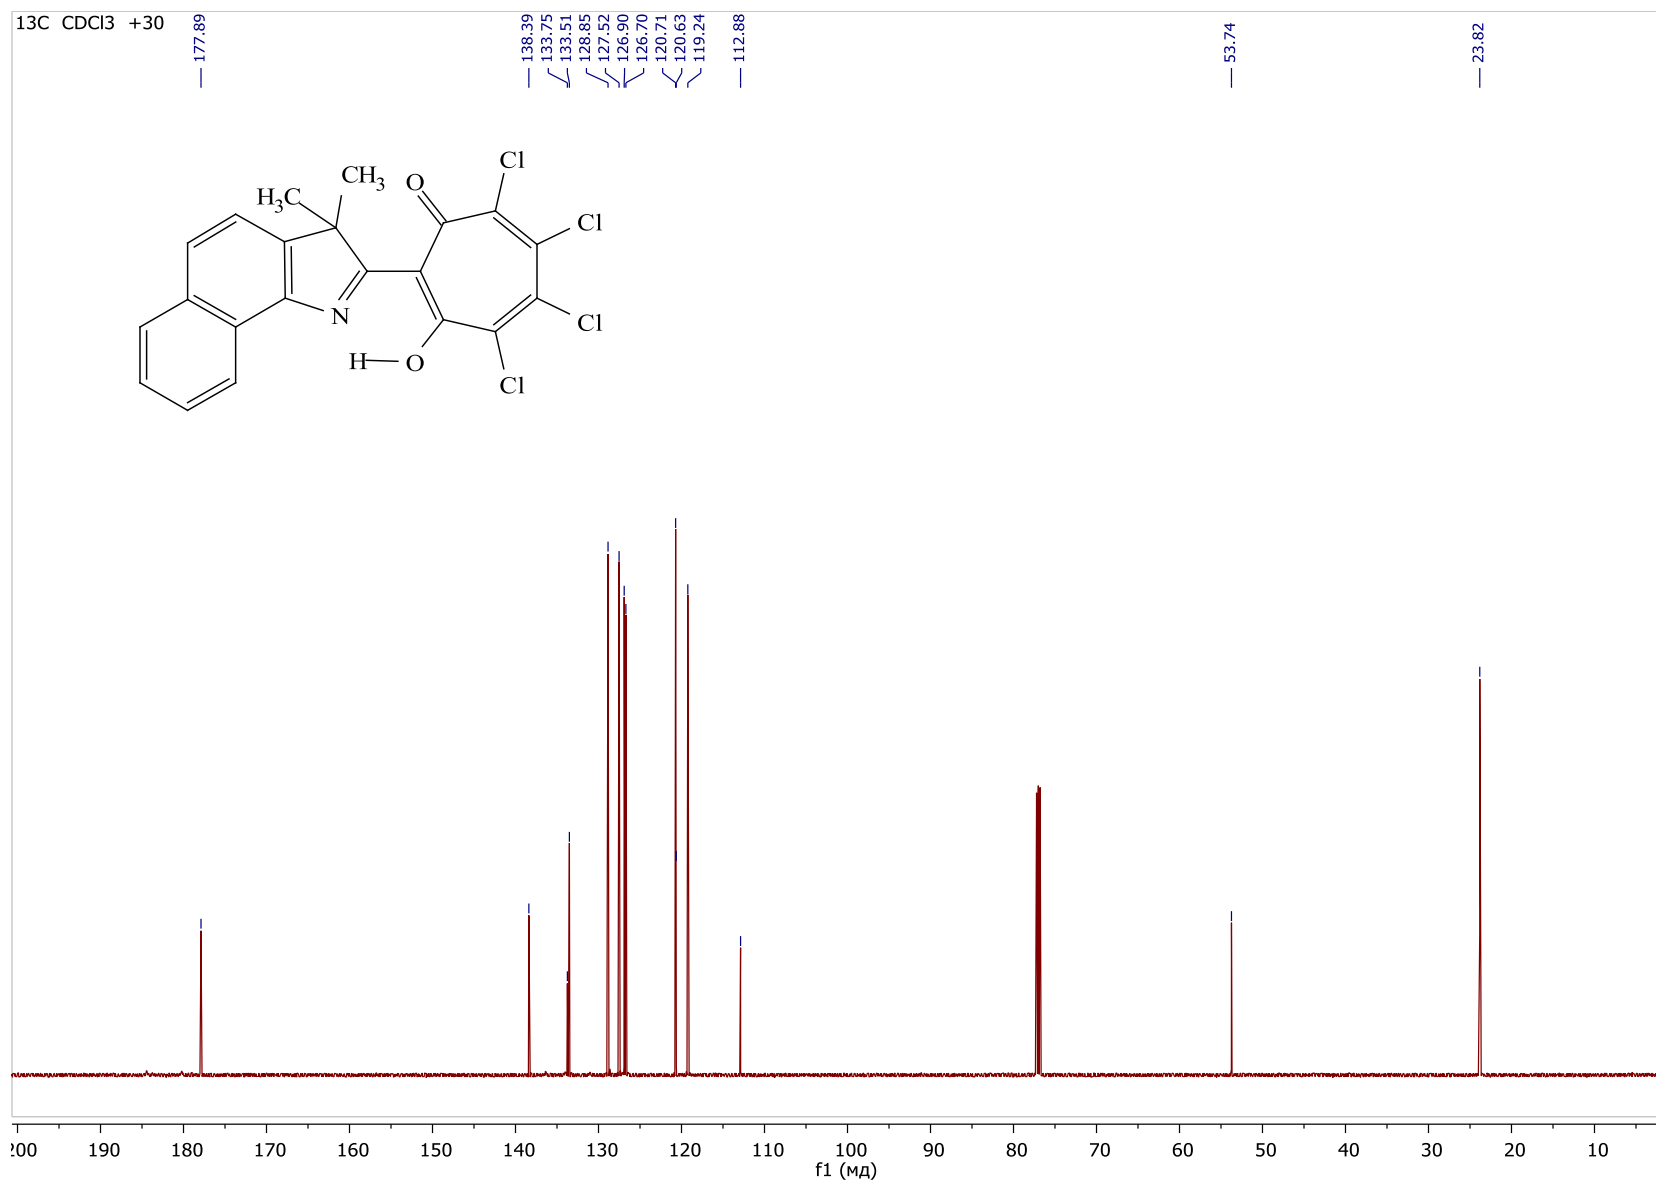

**Figure S8.** <sup>13</sup>C NMR spectrum of compound **8b** in CDCl<sub>3</sub>.

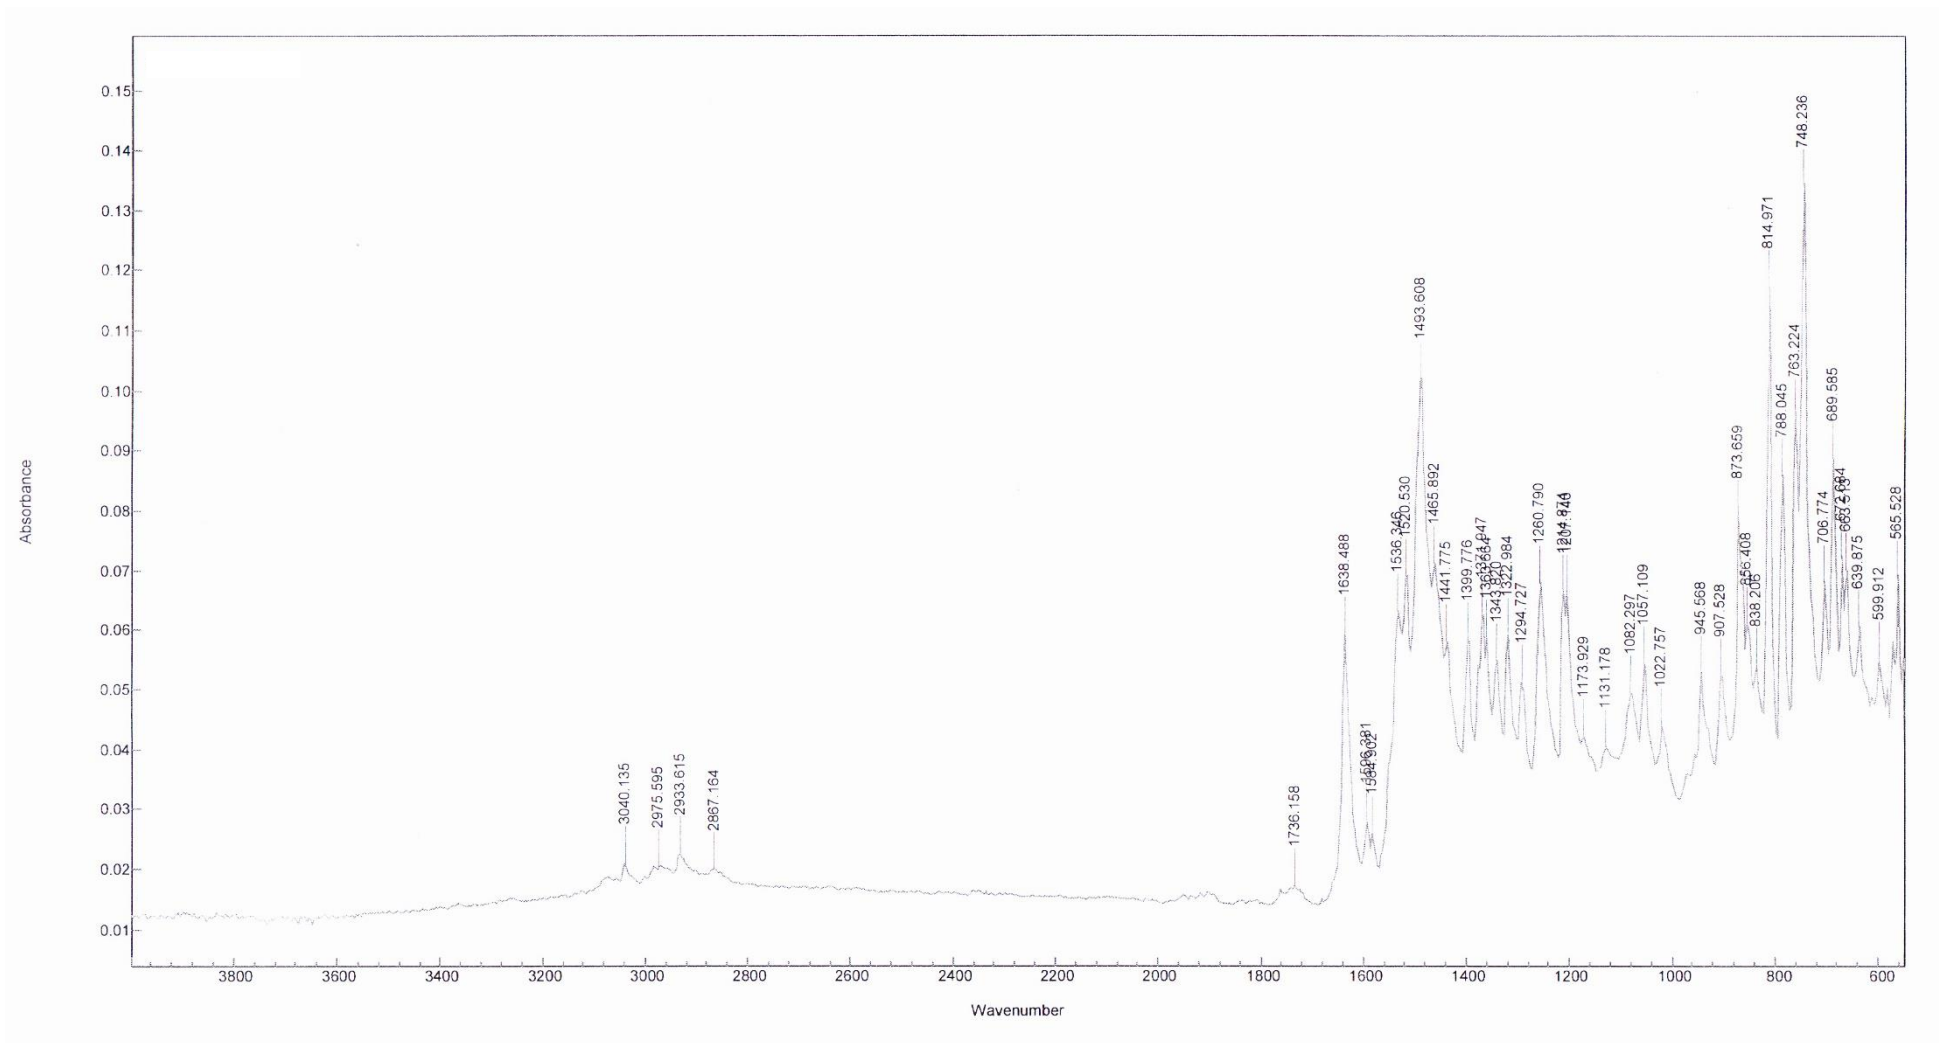

Figure S9. IR spectrum of compound 7a.

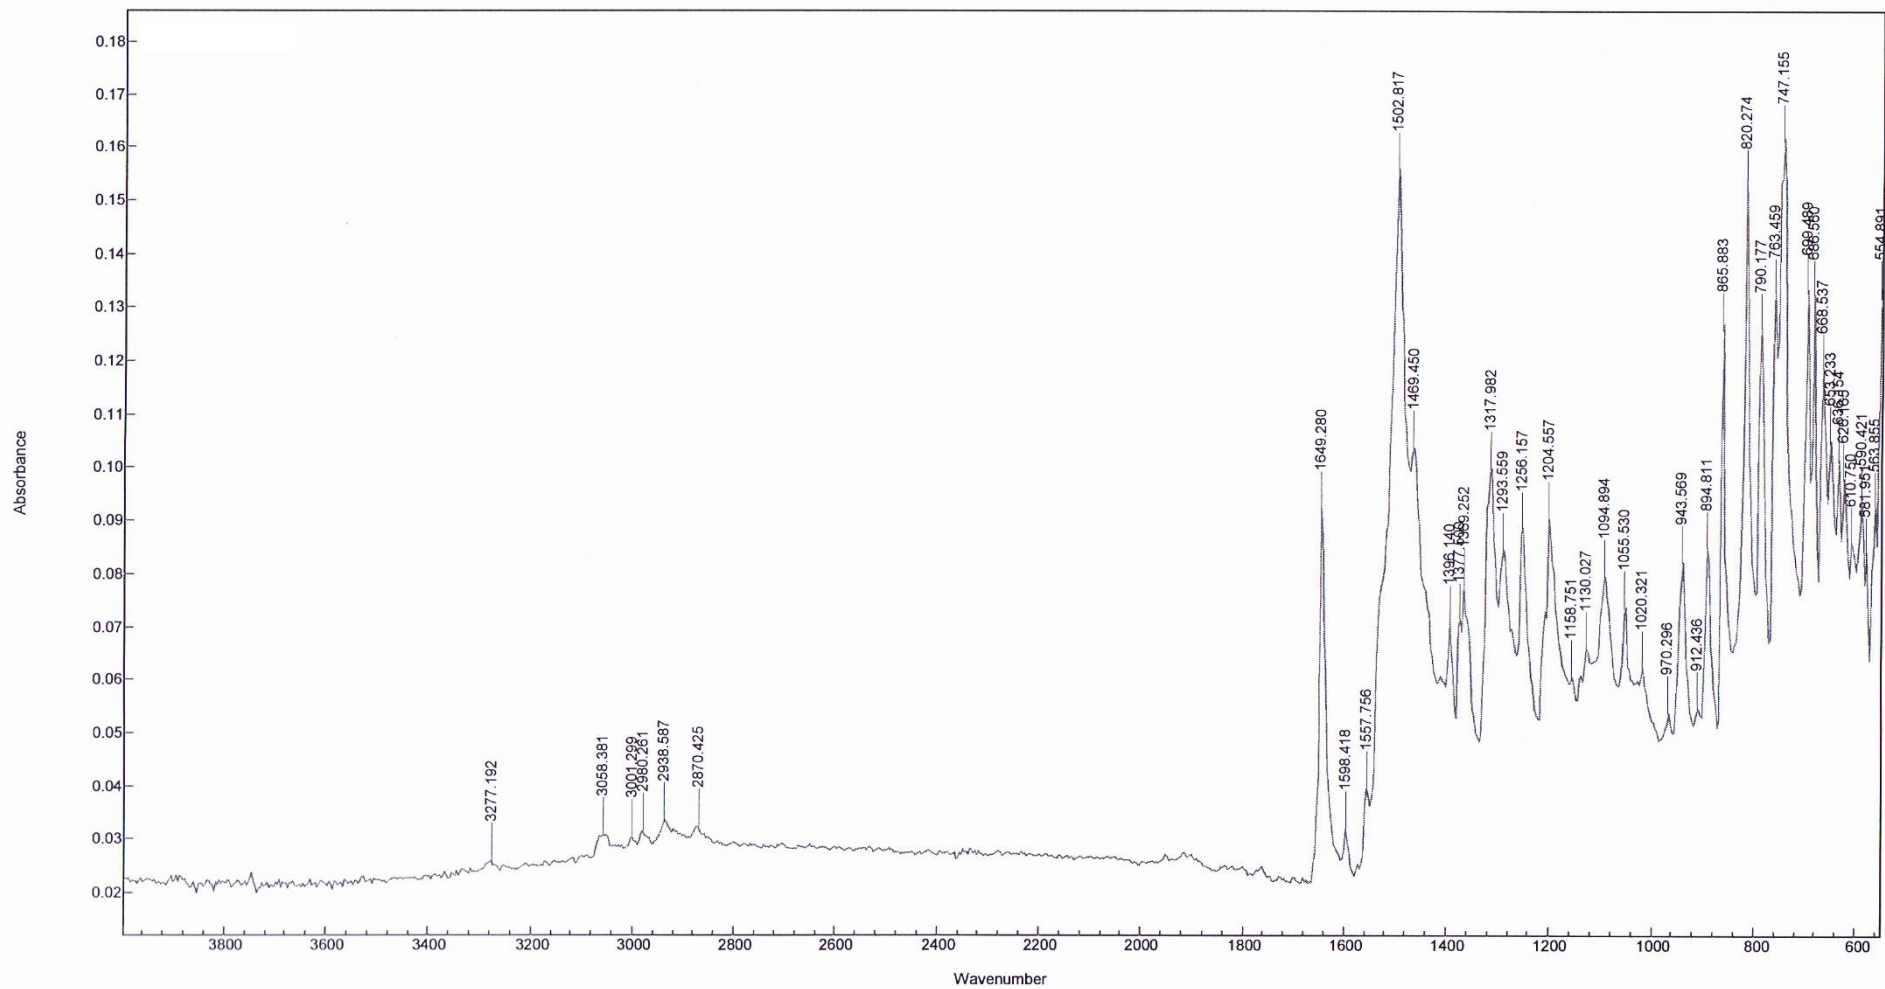

**Figure S10.** IR spectrum of compound **7b**.

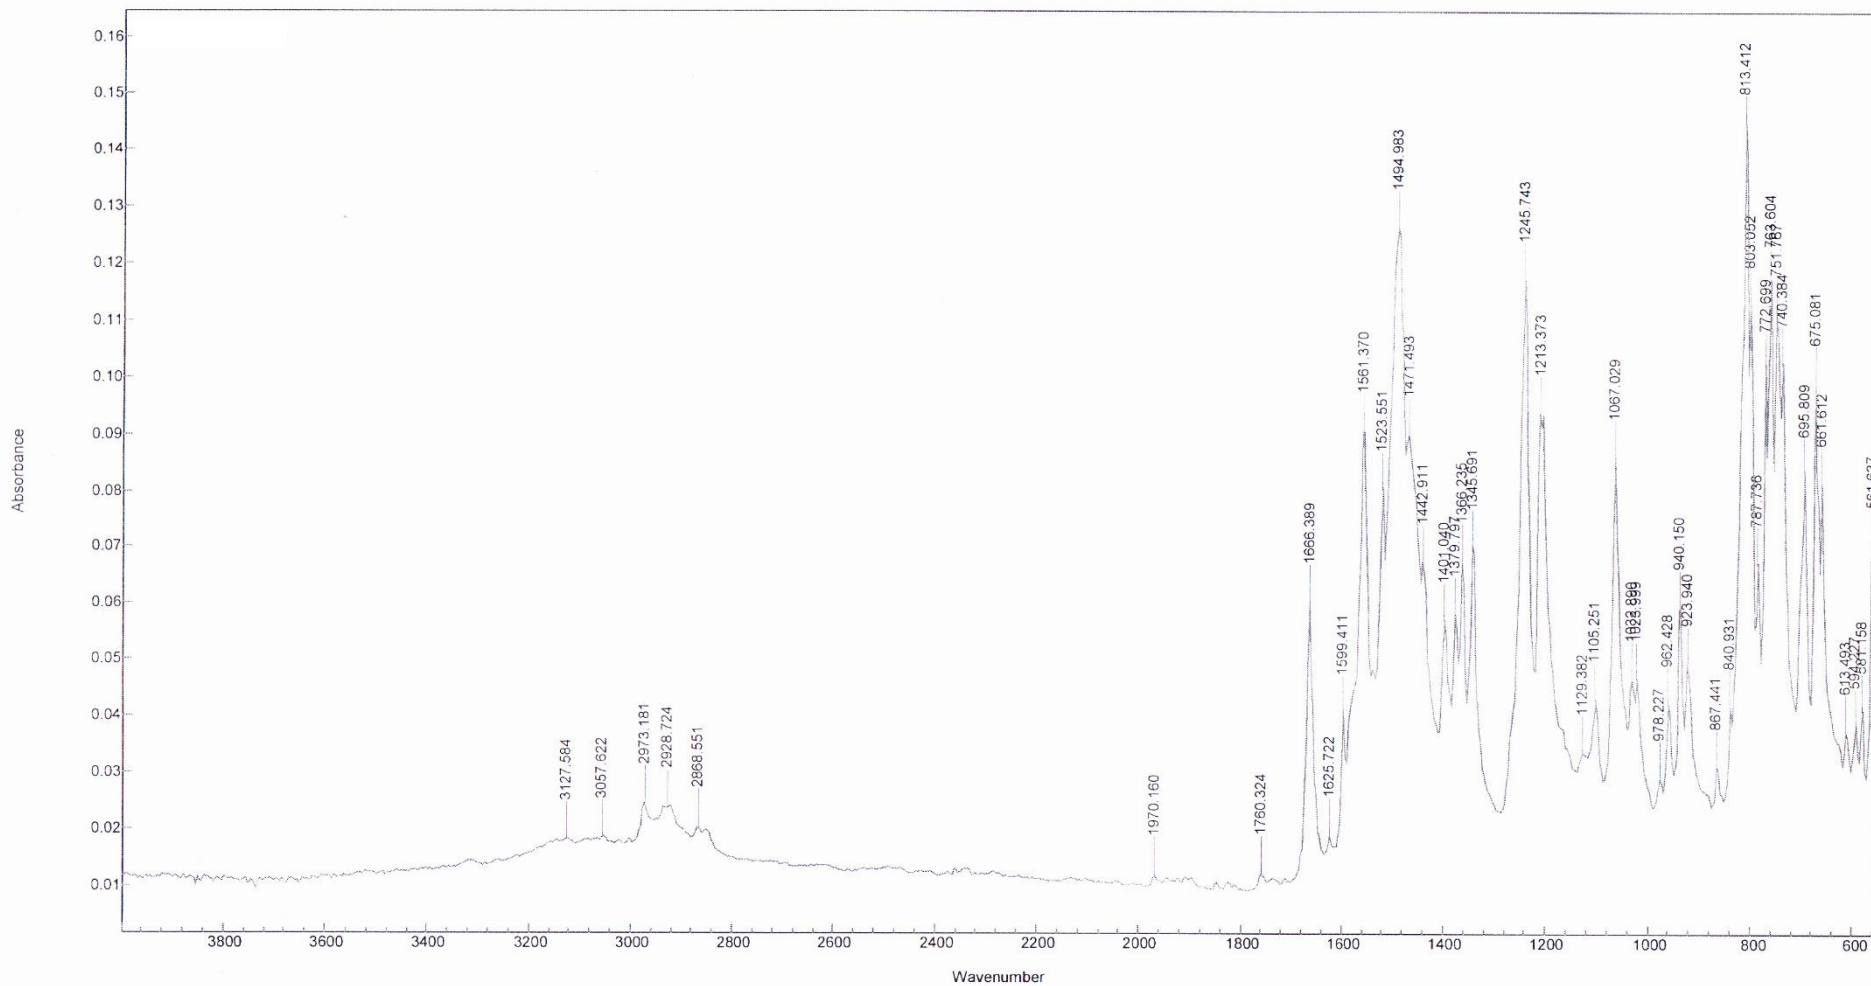

Figure S11. IR spectrum of compound 8a.

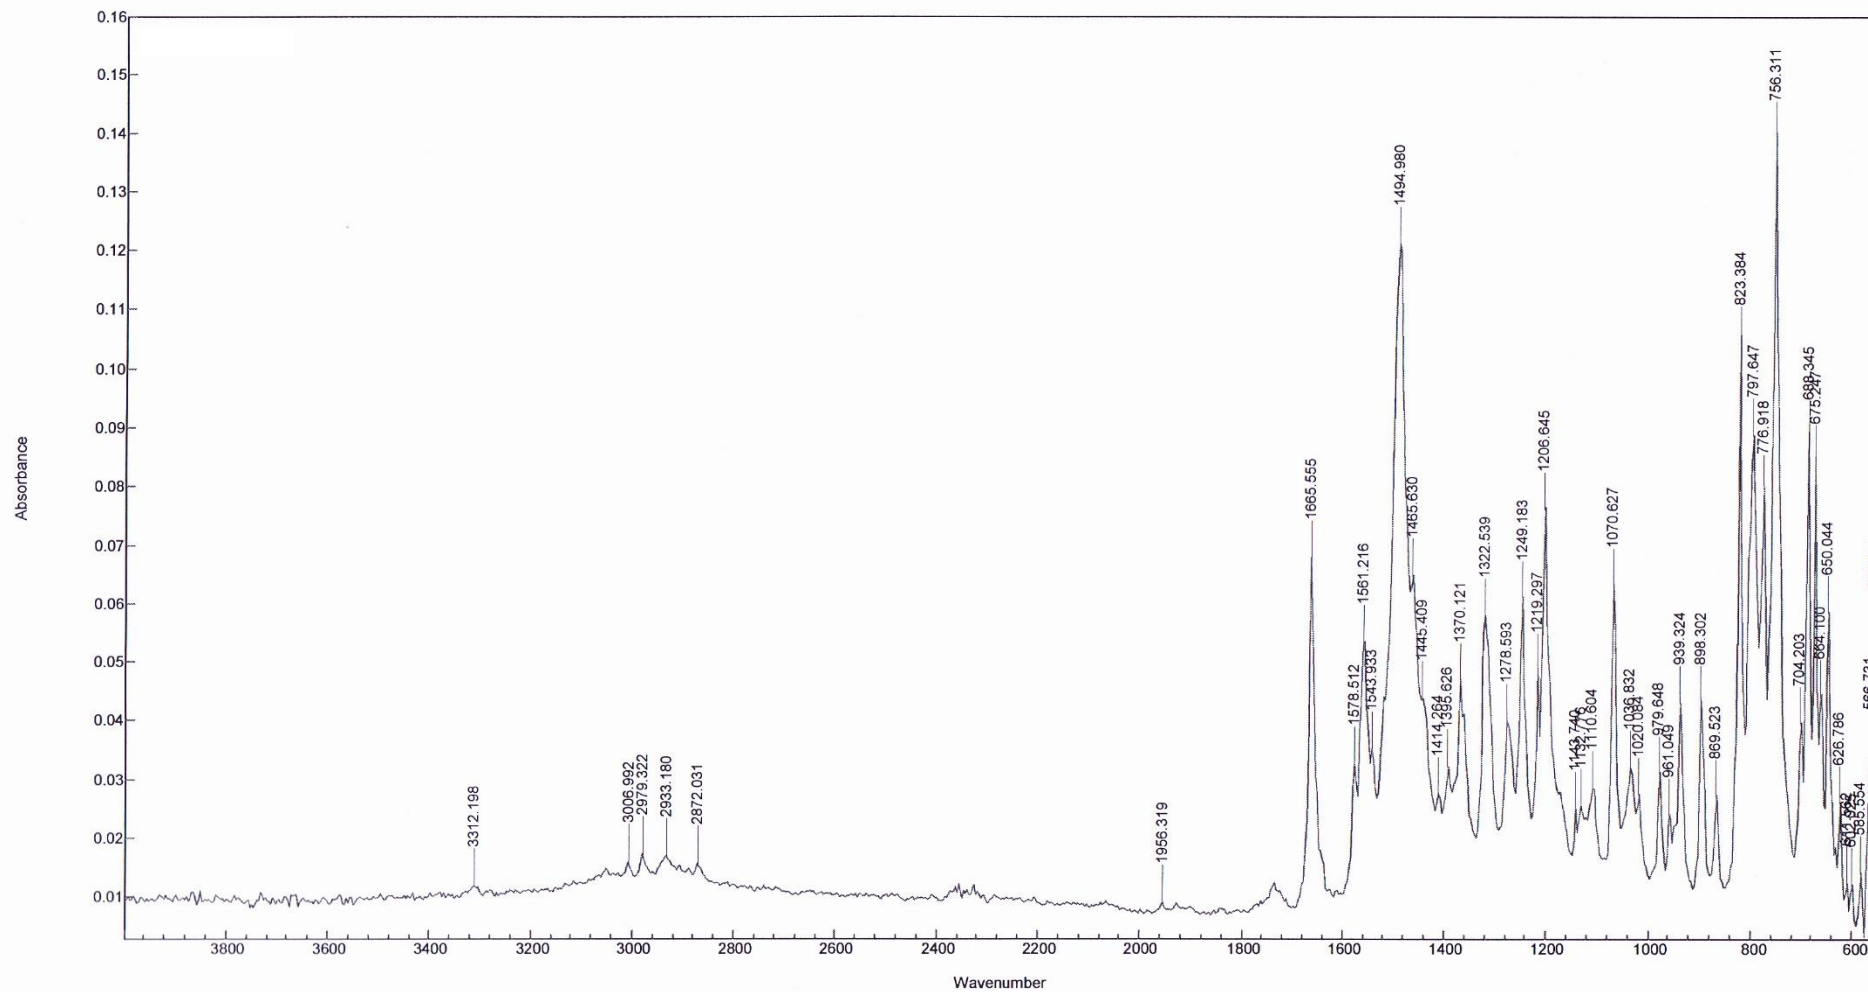

Figure S12. IR spectrum of compound 8b.

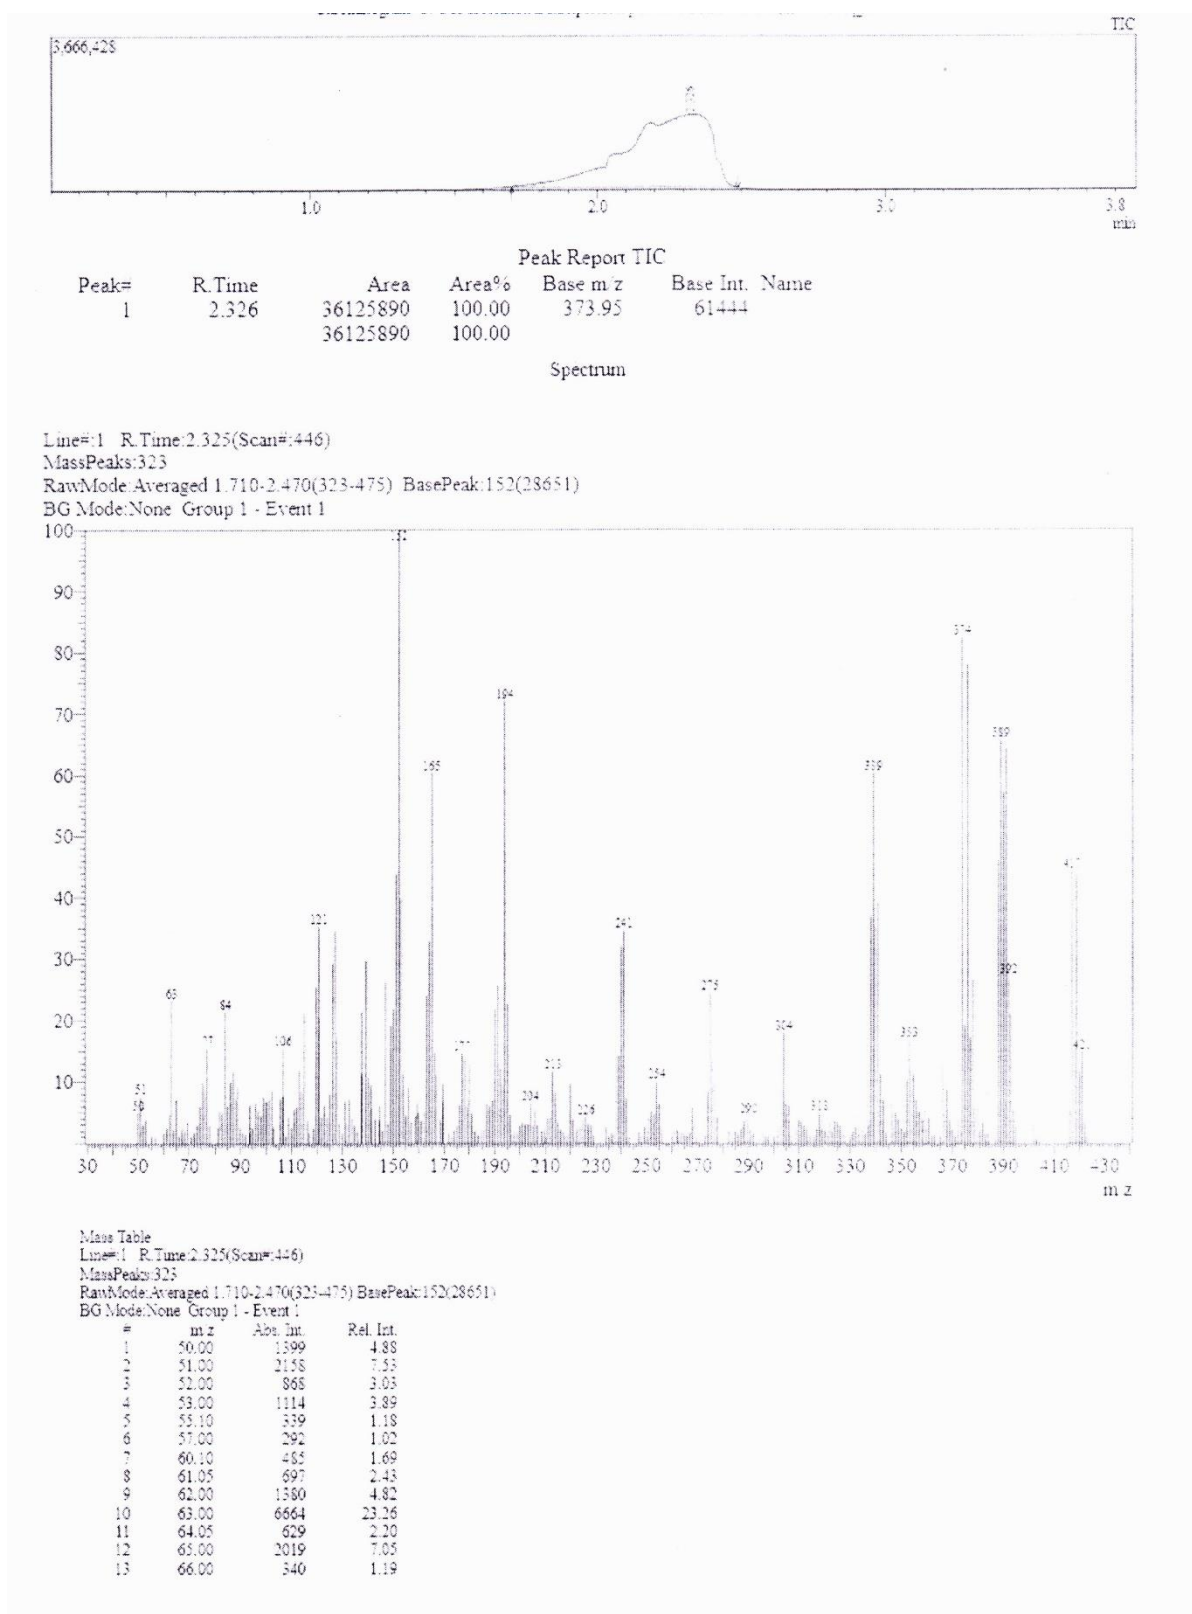

Figure S13. Mass spectrum of compound 7a.

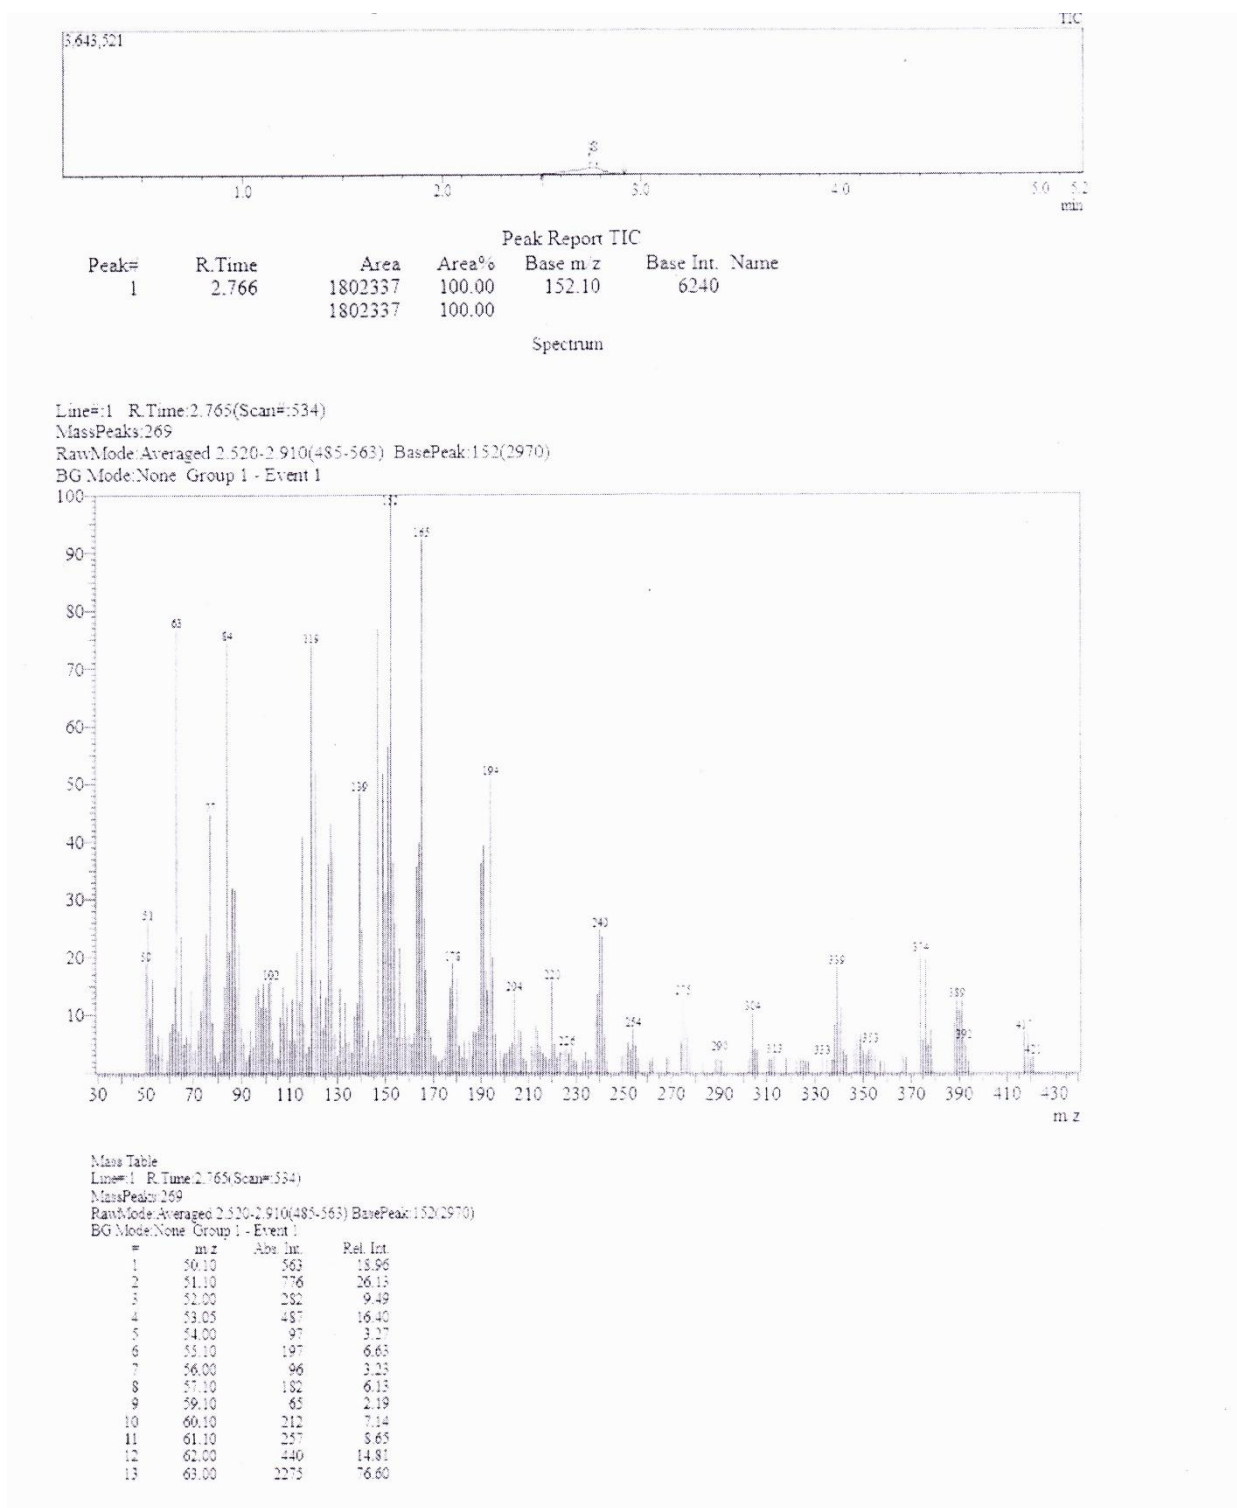

**Figure S14.** Mass spectrum of compound **7b**.

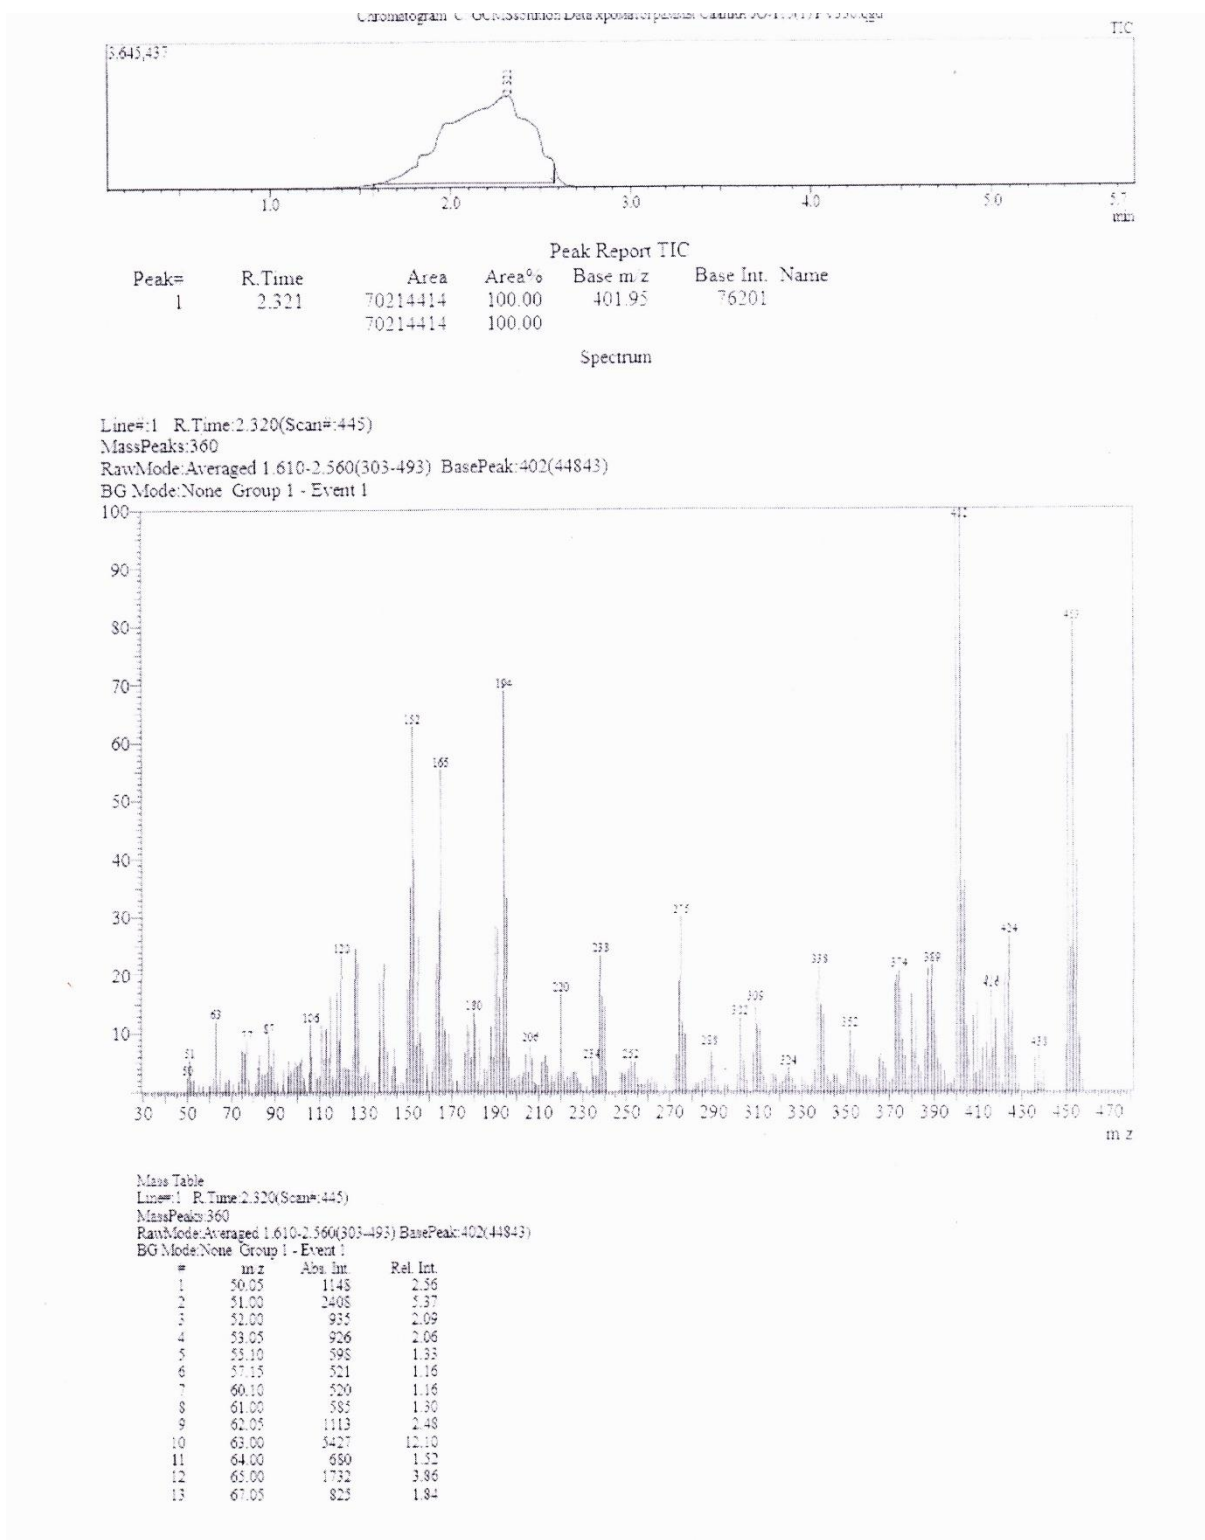

Figure S15. Mass spectrum of compound 8a.



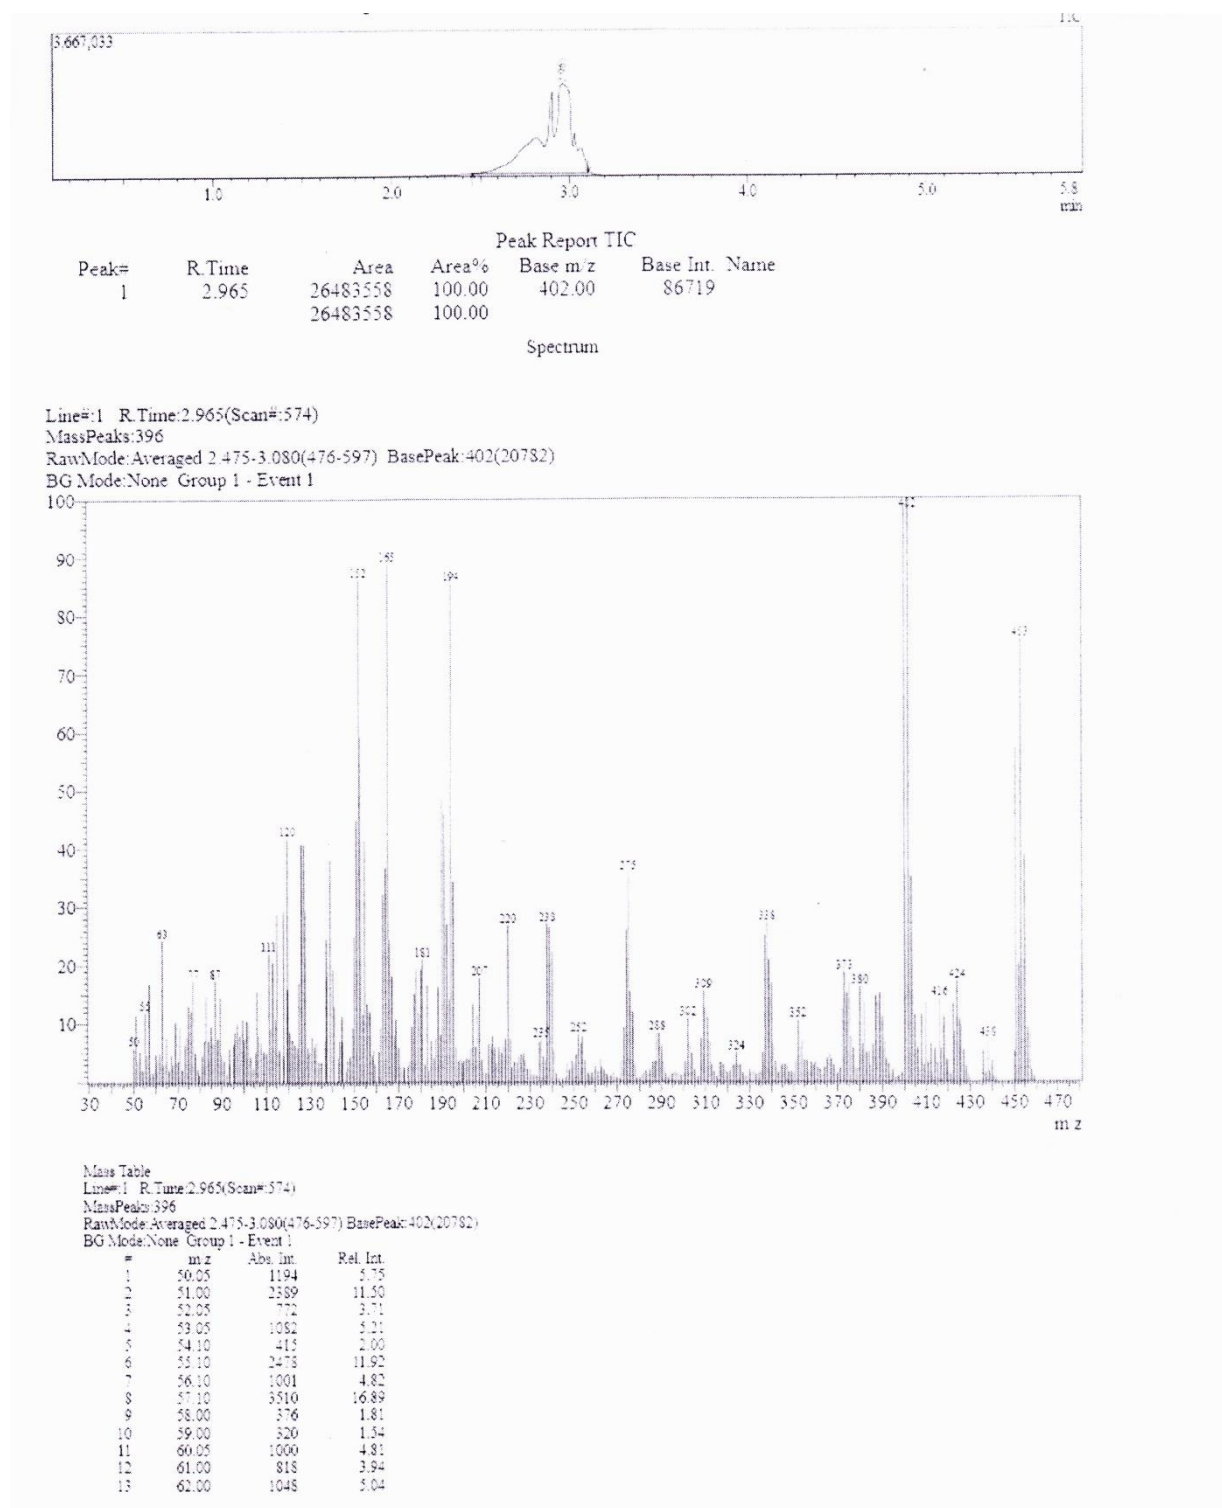

Figure S16. Mass spectrum of compound 8b.

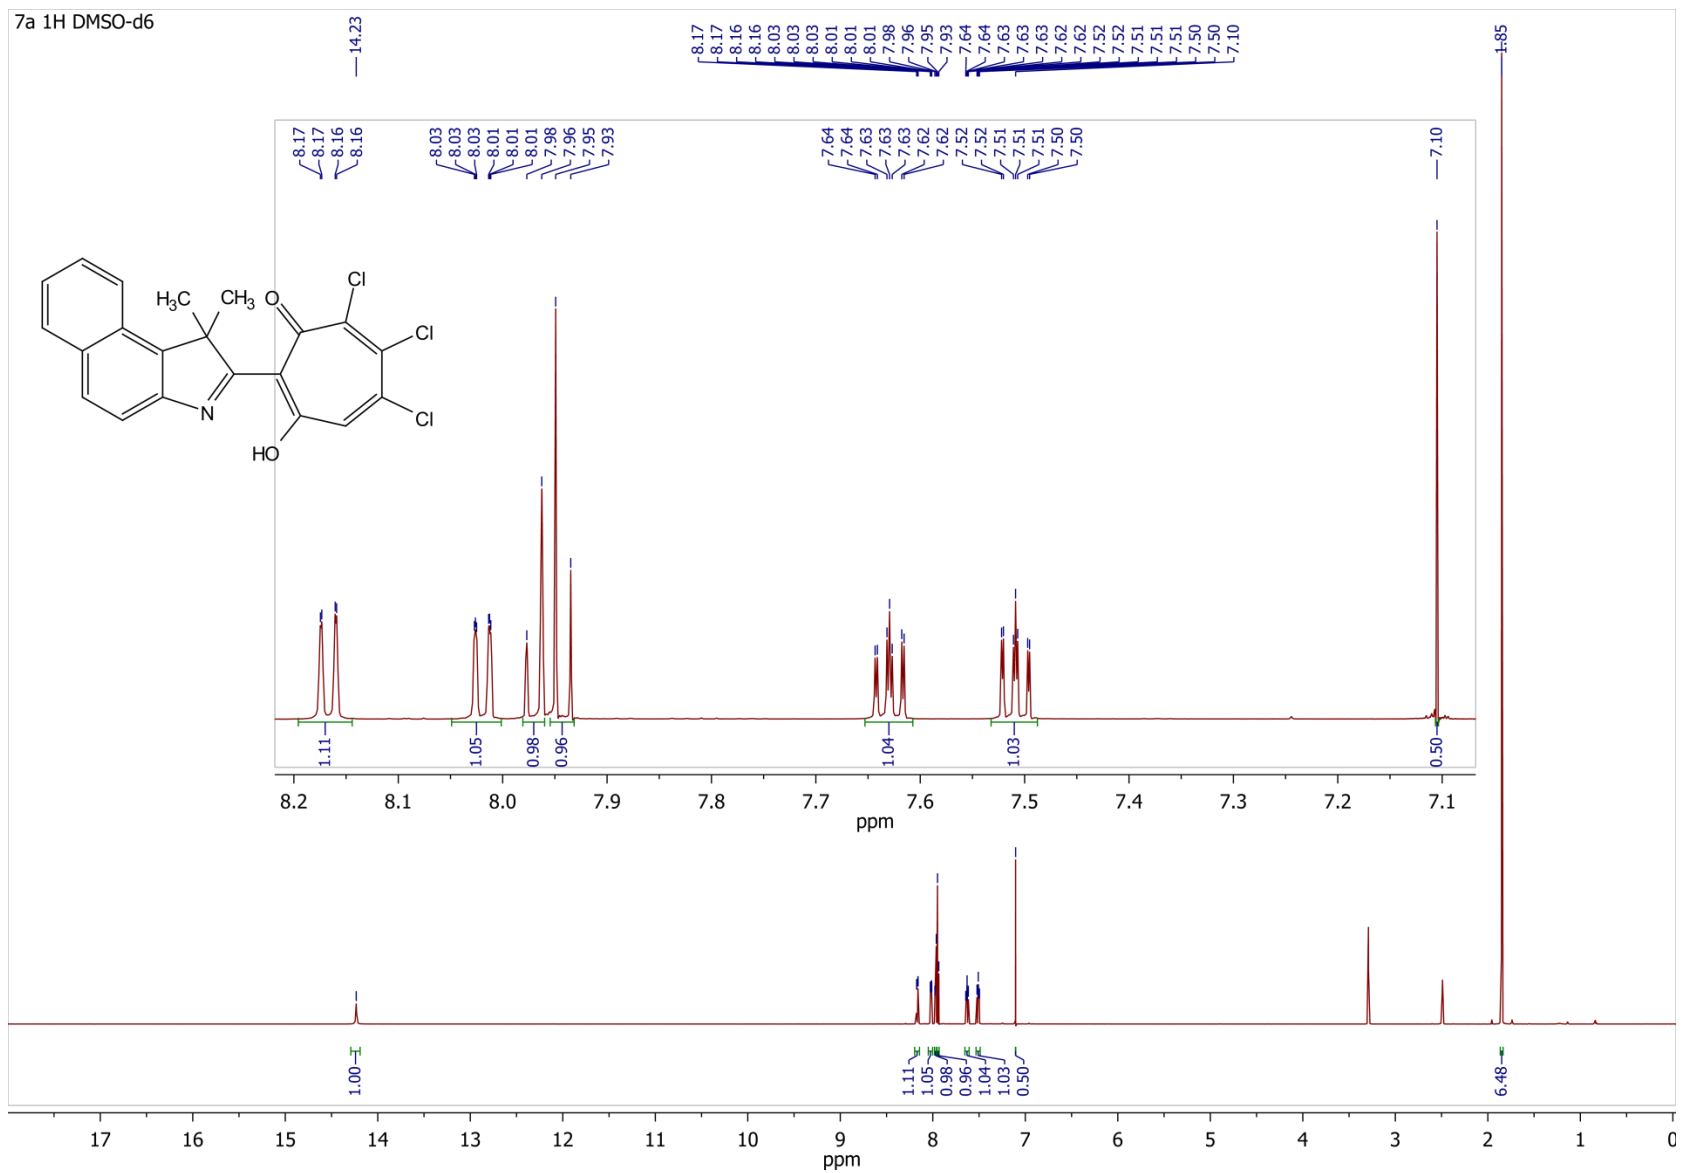

**Figure S17.** <sup>1</sup>H NMR spectrum of compound **7a** in DMSO-d<sub>6</sub>.

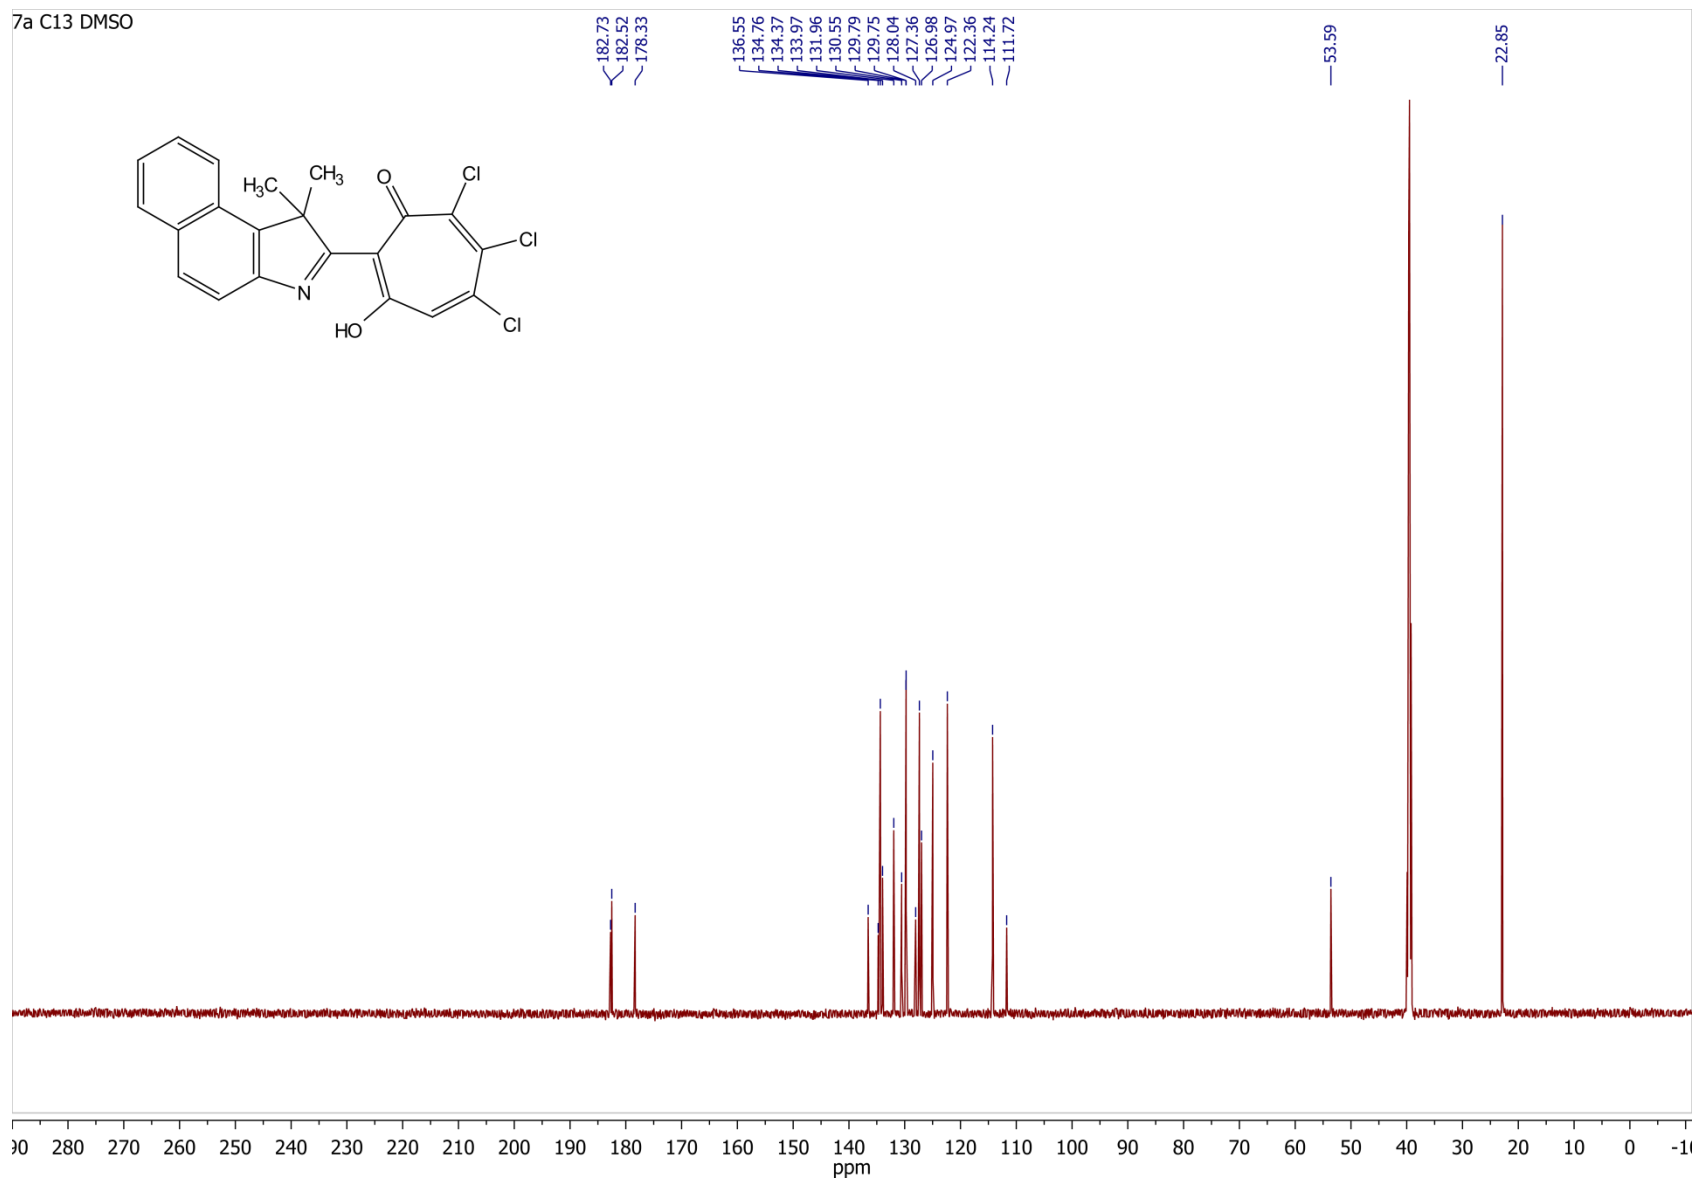

Figure S18. <sup>13</sup>C NMR spectrum of compound 7a in DMSO-*d*<sub>6</sub>.

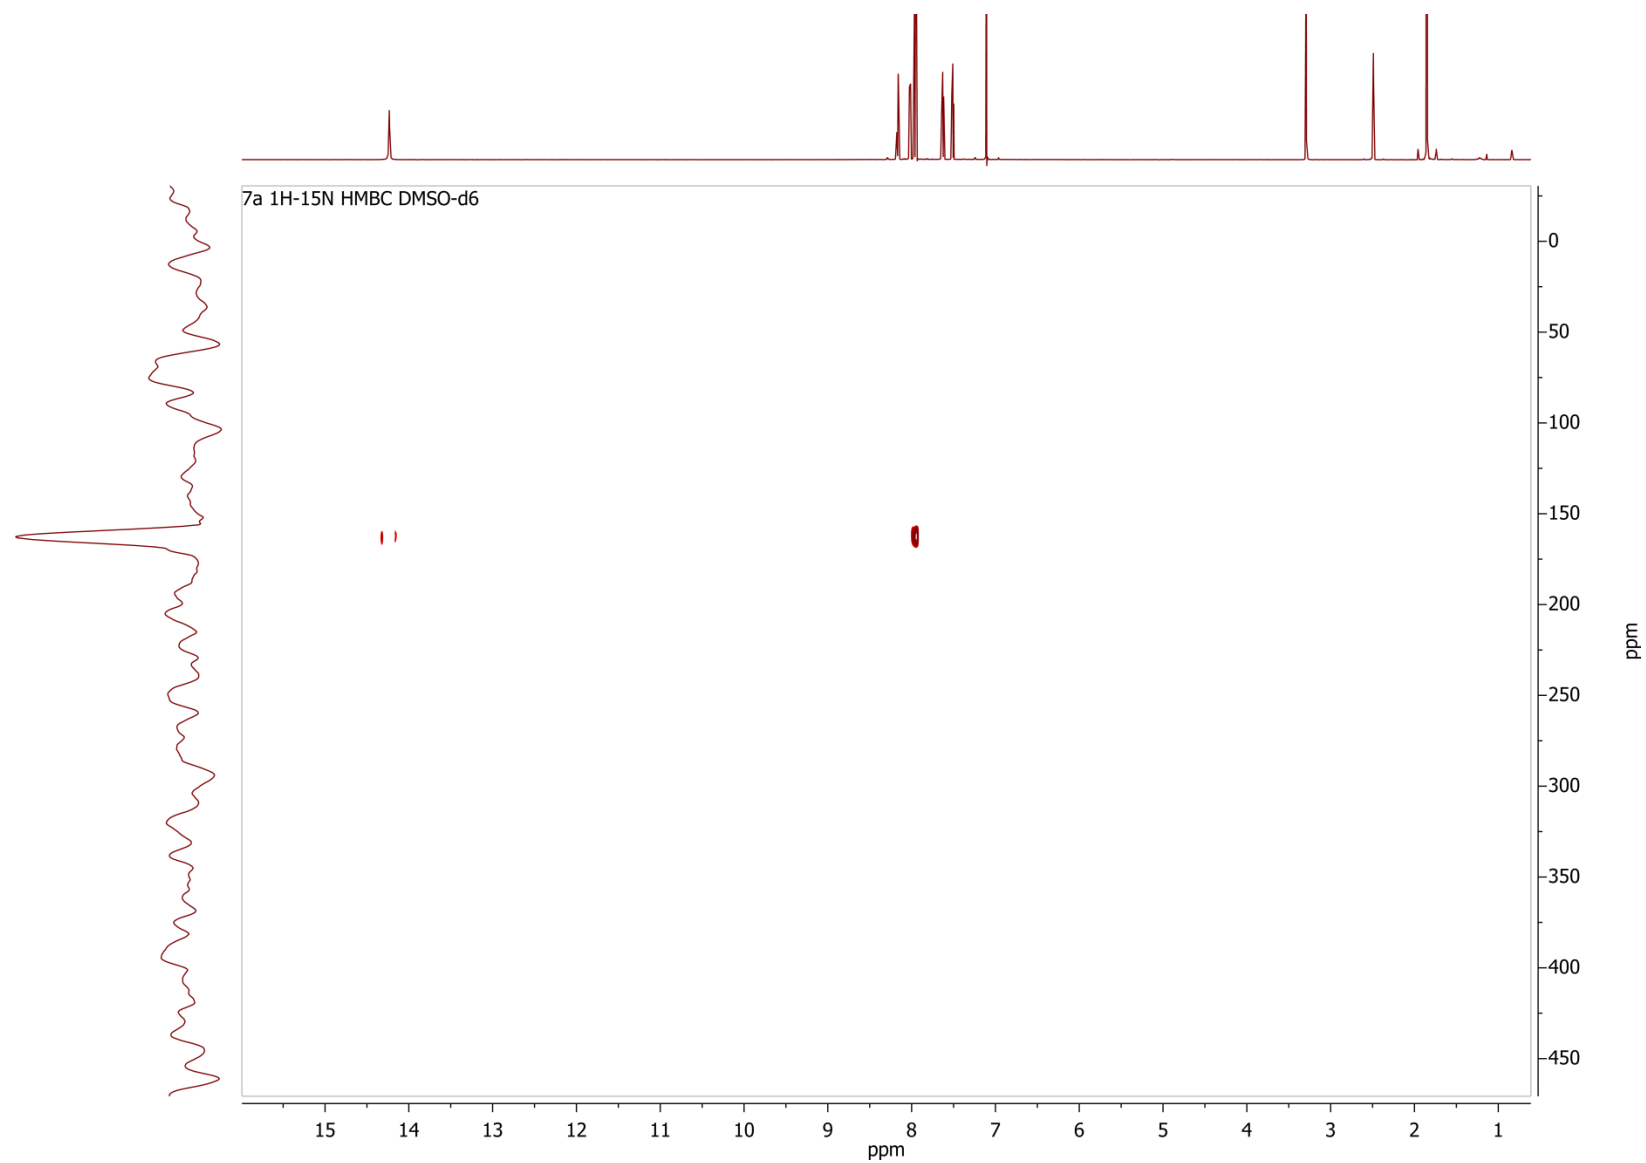

**Figure S19.**  $^1\text{H}$ - $^{15}\text{N}$  HMBC spectrum of compound **7a** in  $\text{DMSO-}d_6$ .

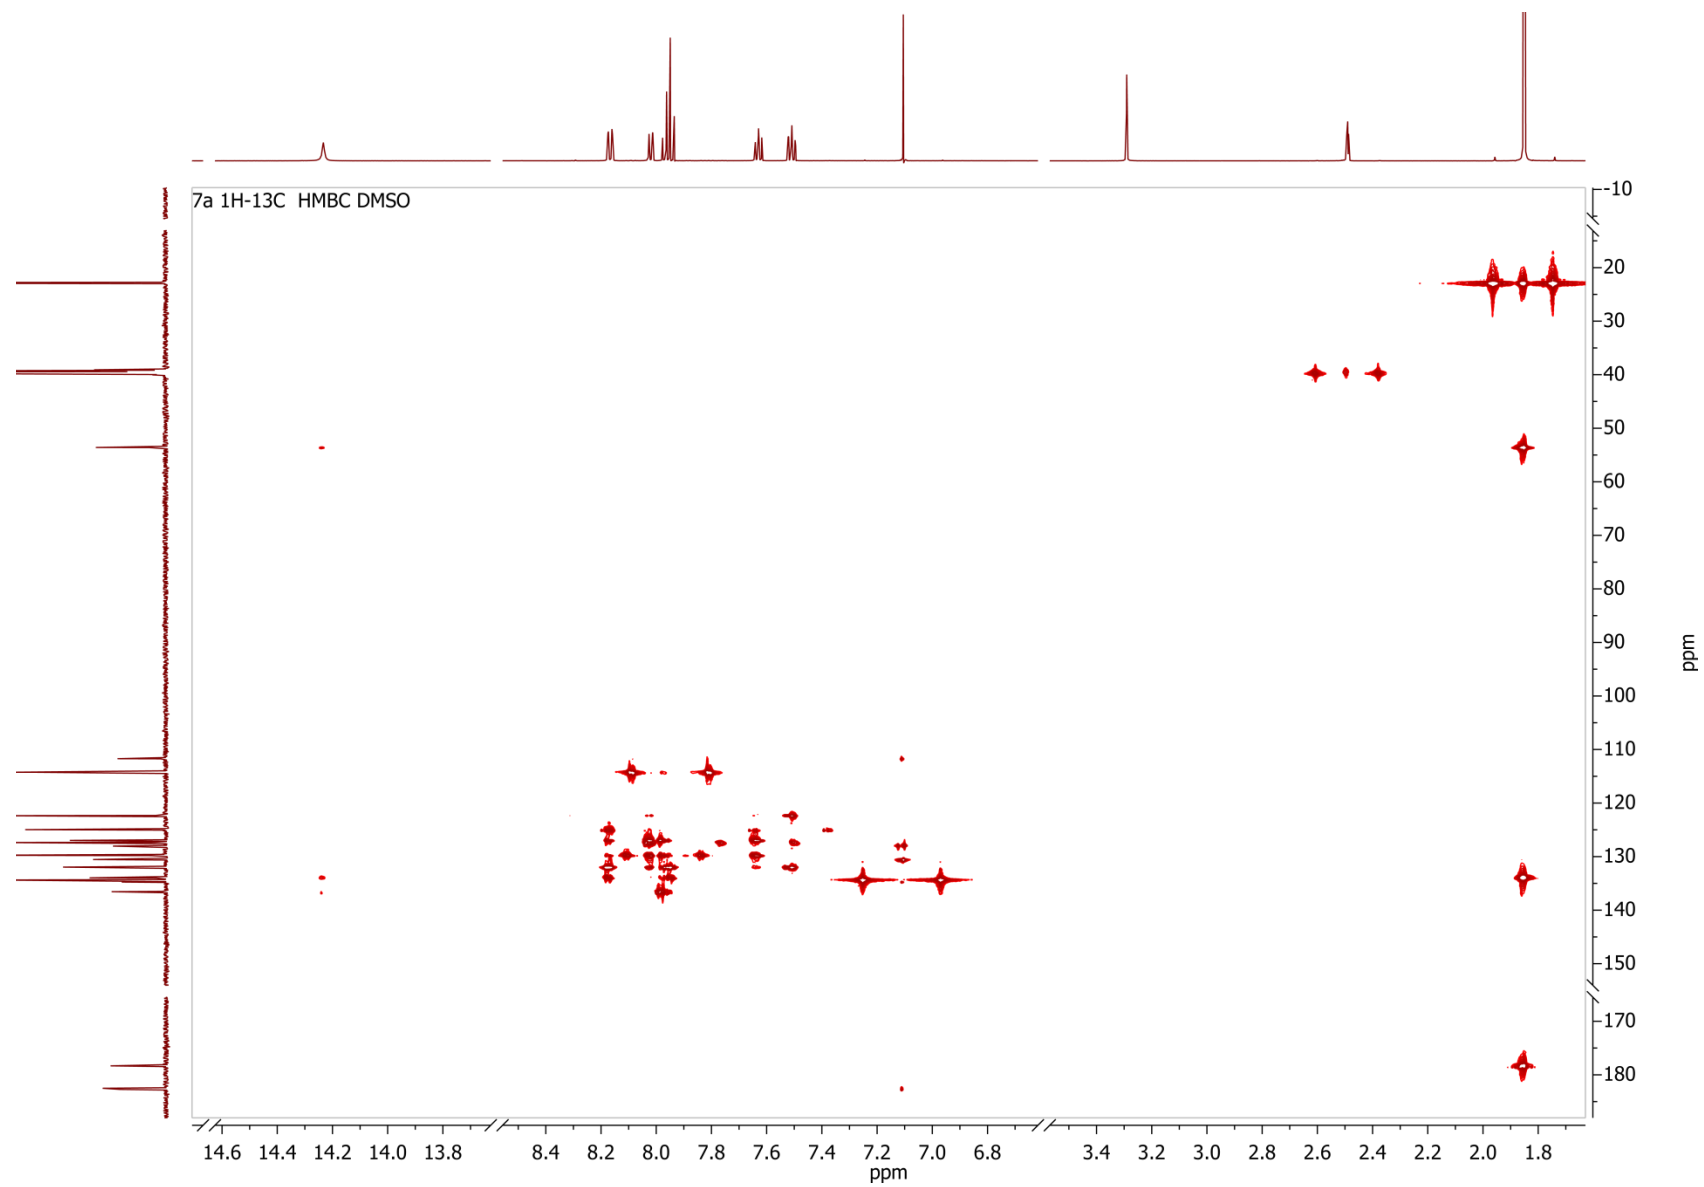

**Figure S20.**  $^1\text{H}$ - $^{13}\text{C}$  HMBC spectrum of compound **7a** in  $\text{DMSO-}d_6$ .

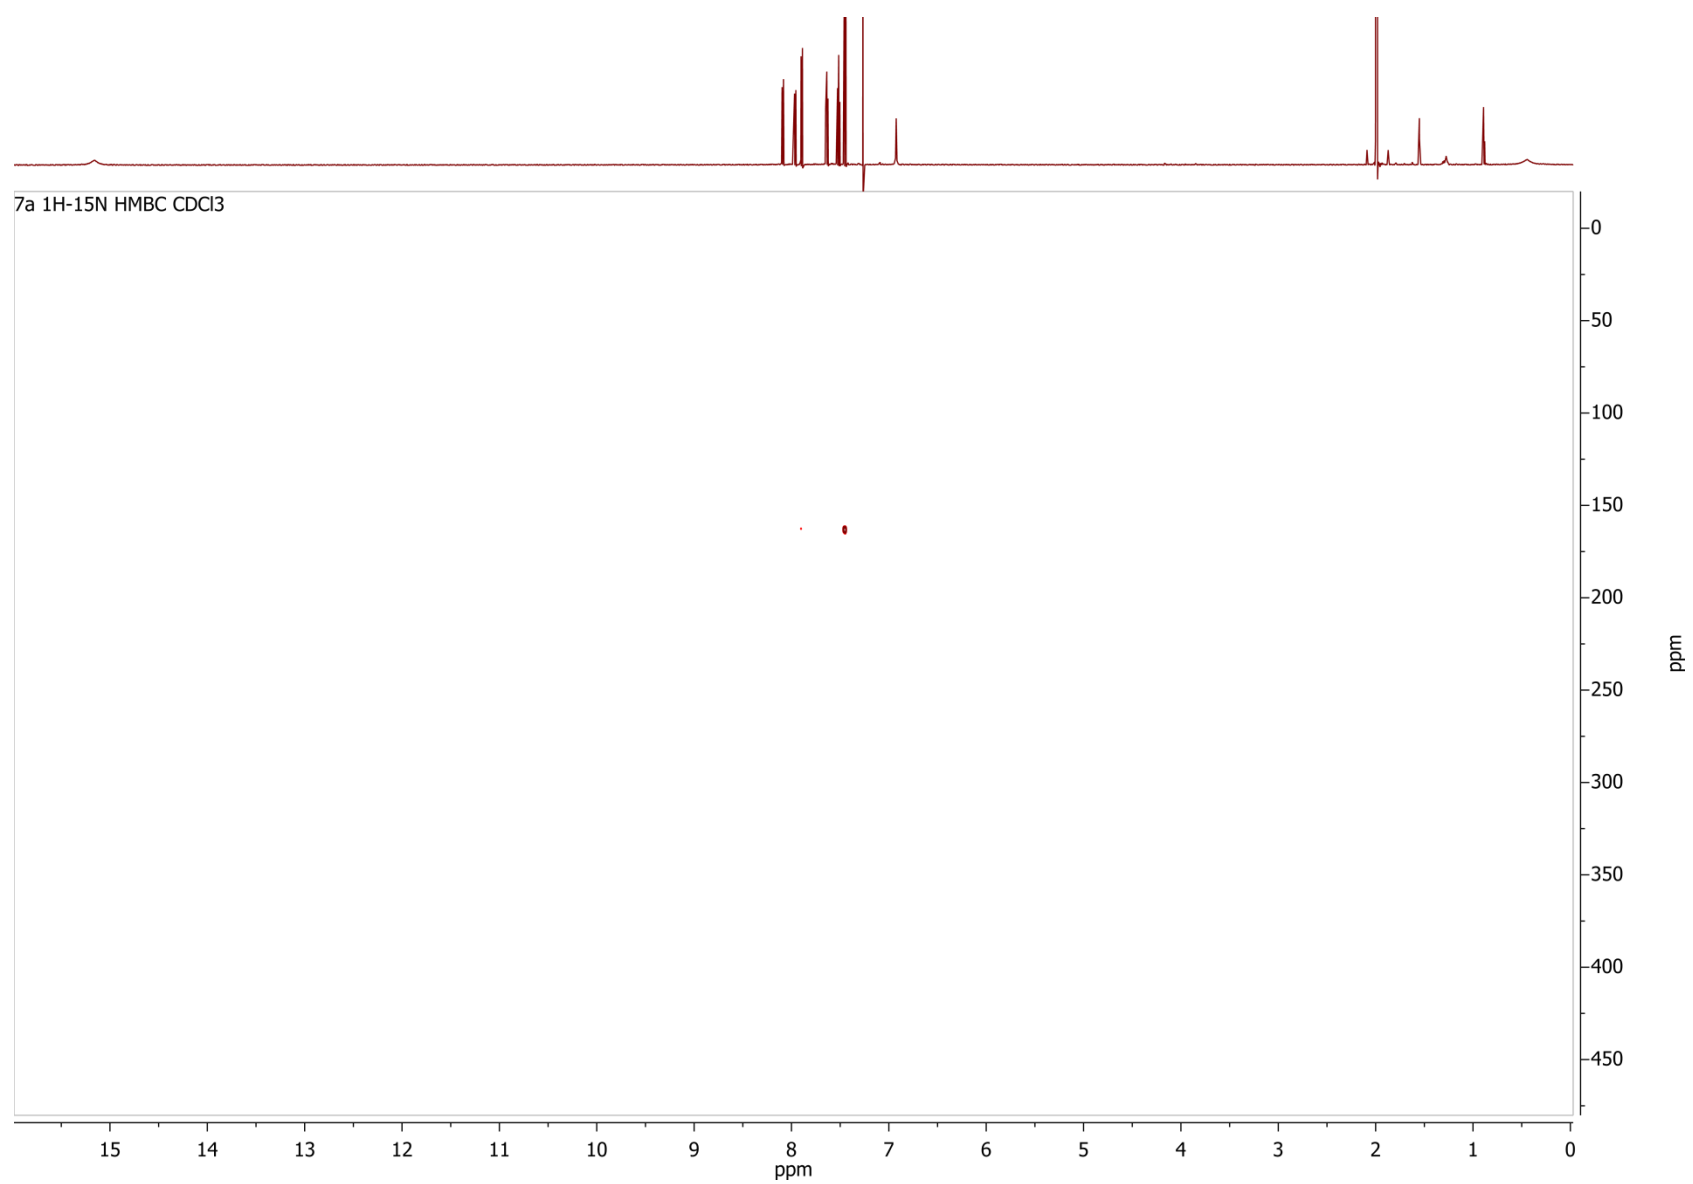

**Figure S21.** <sup>1</sup>H-<sup>15</sup>N HMBC spectrum of compound **7a** in CDCl<sub>3</sub>.

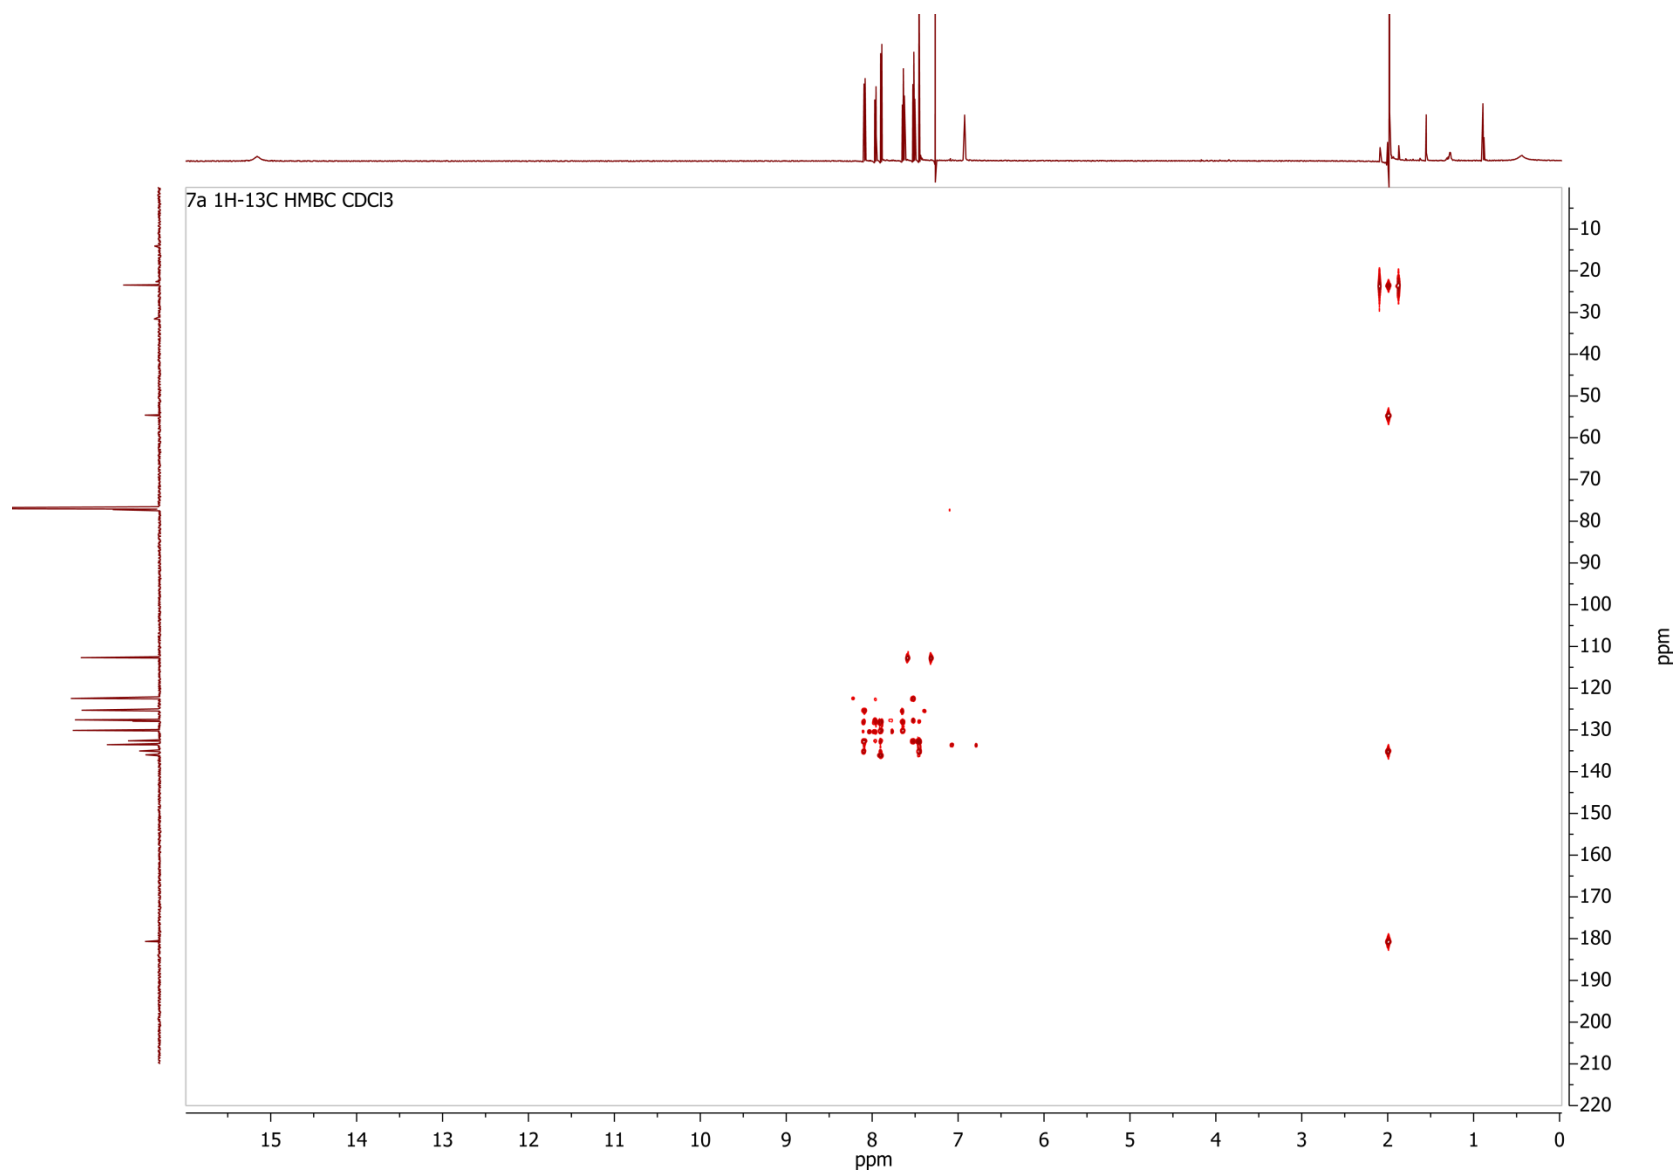

**Figure S22.**  $^1\text{H}$ - $^{13}\text{C}$  HMBC spectrum of compound **7a** in  $\text{CDCl}_3$ .
