# Supplementary material for: Synthesis, structure, ionochromic and cytotoxic properties of new 2-(indolin-2-yl)-1,3-tropolones
Source: publisher site journal article supplement (doi:10.3762/bjoc.21.26), 2025-02-17
Supplement: Additional file 3 [file 1860-5397-21-26-S3.pdf]

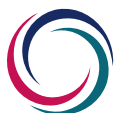

## Supporting Information

for

### **Synthesis, structure, ionochromic and cytotoxic properties of new 2-(indolin-2-yl)-1,3-tropolones**

Yurii A. Sayapin, Eugeny A. Gusakov, Inna O. Tupaeva, Alexander D. Dubonosov, Igor V. Dorogan, Valery V. Tkachev, Anna S. Goncharova, Gennady V. Shilov, Natalia S. Kuznetsova, Svetlana Y. Filippova, Tatyana A. Krasnikova, Yanis A. Bumber, Alexey Y. Maksimov, Sergey M. Aldoshin and Vladimir I. Minkin

*Beilstein J. Org. Chem.* **2025**, *21*, 358–368. [doi:10.3762/bjoc.21.26](https://doi.org/10.3762/bjoc.21.26)

### **X-ray analysis data of 7b and DFT quantum chemical calculations for 7a, 7b, 8a and 8b**

**Table S1:** Crystal data and structure refinement for **7b**.

|                                                              |                                                                              |
|--------------------------------------------------------------|------------------------------------------------------------------------------|
| CCDC Number                                                  | 2040907                                                                      |
| Empirical formula                                            | C <sub>21</sub> H <sub>14</sub> Cl <sub>3</sub> NO <sub>2</sub>              |
| Formula weight                                               | 418.68                                                                       |
| Temperature/K                                                | 150.0(1)                                                                     |
| Crystal system                                               | monoclinic                                                                   |
| Space group                                                  | <i>P</i> 2 <sub>1</sub> / <i>c</i>                                           |
| <i>a</i> /Å                                                  | 11.4480(3)                                                                   |
| <i>b</i> /Å                                                  | 7.4883(2)                                                                    |
| <i>c</i> /Å                                                  | 21.7720(6)                                                                   |
| $\alpha$ /°                                                  | 90.00                                                                        |
| $\beta$ /°                                                   | 102.590(3)                                                                   |
| $\gamma$ /°                                                  | 90.00                                                                        |
| Volume/Å <sup>3</sup>                                        | 1821.55(9)                                                                   |
| <i>Z</i>                                                     | 4                                                                            |
| $\rho_{\text{calc}}$ g/cm <sup>3</sup>                       | 1.527                                                                        |
| $\mu$ /mm <sup>-1</sup>                                      | 0.520                                                                        |
| <i>F</i> (000)                                               | 856                                                                          |
| Crystal size/mm <sup>3</sup>                                 | 0.31 × 0.25 × 0.20                                                           |
| Radiation                                                    | MoK $\alpha$ ( $\lambda$ = 0.7107)                                           |
| Index ranges                                                 | -17 ≤ <i>h</i> ≤ 17, -11 ≤ <i>k</i> ≤ 8, -32 ≤ <i>l</i> ≤ 23                 |
| Reflections collected                                        | 14246                                                                        |
| Independent reflections                                      | 6352 [ <i>R</i> <sub>int</sub> = 0.0214, <i>R</i> <sub>sigma</sub> = 0.0323] |
| Data/restraints/parameters                                   | 6352/0/247                                                                   |
| Goodness-of-fit on <i>F</i> <sup>2</sup>                     | 1.027                                                                        |
| Final <i>R</i> indexes [ <i>I</i> ≥ 2 $\sigma$ ( <i>I</i> )] | <i>R</i> <sub>1</sub> = 0.0385, <i>wR</i> <sub>2</sub> = 0.0928              |
| Final <i>R</i> indexes [all data]                            | <i>R</i> <sub>1</sub> = 0.0534, <i>wR</i> <sub>2</sub> = 0.1003              |
| Largest diff. peak/hole / e Å <sup>-3</sup>                  | 0.431/-0.340                                                                 |

**Table S2:** Bond lengths  $d$  (Å) and angles  $\omega$  (deg) in **7b**.

| Bond              | $d/\text{Å}$        | Bond              | $d/\text{Å}$        | Bond              | $d/\text{Å}$        |
|-------------------|---------------------|-------------------|---------------------|-------------------|---------------------|
| Cl(1)-C(5)        | 1.7393(13)          | N(1)-C(8)         | 1.3381(16)          | C(2)-C(8)         | 1.4139(17)          |
| Cl(2)-C(6)        | 1.7303(12)          | N(1)-C(19)        | 1.4040(16)          | C(2)-C(3)         | 1.4459(17)          |
| Cl(3)-C(7)        | 1.7222(13)          | N(1)-H(1)         | 0.857(18)           | C(3)-C(4)         | 1.4783(18)          |
| O(1)-C(1)         | 1.2194(16)          | C(1)-C(2)         | 1.4702(17)          | C(4)-C(5)         | 1.3391(18)          |
| O(2)-C(3)         | 1.2543(15)          | C(1)-C(7)         | 1.5170(17)          | C(5)-C(6)         | 1.4636(18)          |
| C(6)-C(7)         | 1.3407(18)          | C(9)-C(20)        | 1.549(2)            | C(12)-C(13)       | 1.420(2)            |
| C(8)-C(9)         | 1.5391(18)          | C(10)-C(19)       | 1.3722(19)          | C(13)-C(14)       | 1.423(2)            |
| C(9)-C(10)        | 1.5156(19)          | C(10)-C(11)       | 1.4064(19)          | C(13)-C(18)       | 1.431(2)            |
| C(9)-C(21)        | 1.5316(19)          | C(11)-C(12)       | 1.372(2)            | C(14)-C(15)       | 1.364(3)            |
| C(15)-C(16)       | 1.415(2)            | C(16)-C(17)       | 1.3754(19)          | C(17)-C(18)       | 1.414(2)            |
| Angle             | $\omega/\text{deg}$ | Angle             | $\omega/\text{deg}$ | Angle             | $\omega/\text{deg}$ |
| C(8)-N(1)-C(19)   | 112.37(11)          | C(3)-C(2)-C(1)    | 120.92(11)          | C(7)-C(6)-C(5)    | 122.86(11)          |
| C(8)-N(1)-H(1)    | 115.4(11)           | O(2)-C(3)-C(2)    | 122.75(11)          | C(7)-C(6)-Cl(2)   | 120.01(10)          |
| C(19)-N(1)-H(1)   | 131.9(11)           | O(2)-C(3)-C(4)    | 114.20(11)          | C(5)-C(6)-Cl(2)   | 117.09(9)           |
| O(1)-C(1)-C(2)    | 124.45(11)          | C(2)-C(3)-C(4)    | 122.84(11)          | C(6)-C(7)-C(1)    | 127.44(11)          |
| O(1)-C(1)-C(7)    | 118.05(11)          | C(5)-C(4)-C(3)    | 129.68(12)          | C(6)-C(7)-Cl(3)   | 120.95(10)          |
| C(2)-C(1)-C(7)    | 117.00(11)          | C(4)-C(5)-C(6)    | 126.57(11)          | C(1)-C(7)-Cl(3)   | 111.61(9)           |
| C(8)-C(2)-C(3)    | 118.81(11)          | C(4)-C(5)-Cl(1)   | 117.19(10)          | N(1)-C(8)-C(2)    | 120.54(11)          |
| C(8)-C(2)-C(1)    | 120.26(11)          | C(6)-C(5)-Cl(1)   | 116.22(9)           | N(1)-C(8)-C(9)    | 108.17(11)          |
| C(2)-C(8)-C(9)    | 131.14(11)          | C(19)-C(10)-C(9)  | 109.60(11)          | C(14)-C(15)-C(16) | 120.71(14)          |
| C(10)-C(9)-C(21)  | 111.95(12)          | C(11)-C(10)-C(9)  | 129.96(13)          | C(17)-C(16)-C(15) | 120.28(15)          |
| C(10)-C(9)-C(8)   | 100.67(10)          | C(12)-C(11)-C(10) | 118.44(15)          | C(16)-C(17)-C(18) | 119.94(14)          |
| C(21)-C(9)-C(8)   | 114.77(11)          | C(11)-C(12)-C(13) | 121.75(14)          | C(19)-C(18)-C(17) | 124.49(13)          |
| C(10)-C(9)-C(20)  | 107.26(10)          | C(12)-C(13)-C(14) | 121.86(14)          | C(19)-C(18)-C(13) | 115.27(13)          |
| C(21)-C(9)-C(20)  | 111.53(12)          | C(12)-C(13)-C(18) | 120.38(13)          | C(17)-C(18)-C(13) | 120.19(12)          |
| C(8)-C(9)-C(20)   | 109.96(11)          | C(14)-C(13)-C(18) | 117.74(15)          | C(10)-C(19)-N(1)  | 108.59(11)          |
| C(19)-C(10)-C(11) | 120.30(13)          | C(15)-C(14)-C(13) | 121.04(15)          | C(10)-C(19)-C(18) | 123.74(12)          |

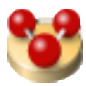

7b.cif

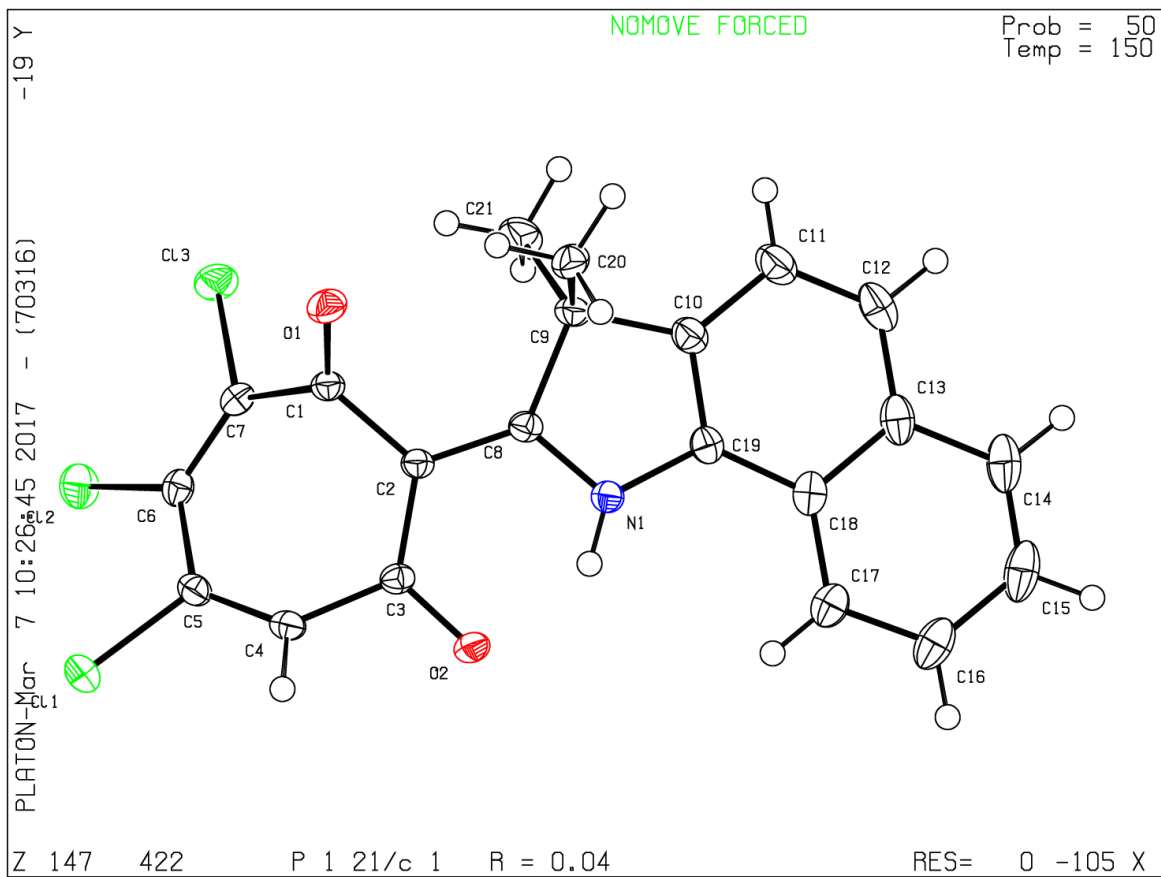

**Table S3:** Optimized structure (Cartesian coordinates, Å) of **7a** isomers calculated by the PBE0/6-311+ G(d,p) method in the gas phase.

| <b>7a (NH)</b> |           |           |           | <b>7a (OH)</b> |           |           |           |
|----------------|-----------|-----------|-----------|----------------|-----------|-----------|-----------|
|                | X         | Y         | Z         |                | X         | Y         | Z         |
| 1 C            | 5.133779  | 0.740503  | -0.465361 | 1 C            | 5.127637  | 0.763631  | -0.452105 |
| 2 C            | 4.718896  | 2.044618  | -0.836623 | 2 C            | 4.711678  | 2.098690  | -0.696011 |
| 3 C            | 3.405569  | 2.426372  | -0.768508 | 3 C            | 3.401830  | 2.473968  | -0.568939 |
| 4 C            | 2.484595  | 1.466857  | -0.321527 | 4 C            | 2.474759  | 1.486270  | -0.191937 |
| 5 C            | 2.821386  | 0.186792  | 0.047923  | 5 C            | 2.824289  | 0.175580  | 0.054802  |
| 6 C            | 4.175199  | -0.220715 | -0.002879 | 6 C            | 4.173744  | -0.231813 | -0.058190 |
| 7 C            | 0.492028  | 0.537547  | 0.247733  | 7 C            | 0.536502  | 0.553689  | 0.314612  |
| 8 N            | 1.110732  | 1.635309  | -0.183904 | 8 N            | 1.105218  | 1.680403  | -0.032428 |
| 9 C            | -0.918267 | 0.509242  | 0.335495  | 9 C            | -0.916949 | 0.517657  | 0.388851  |
| 10 C           | -4.075495 | 0.970710  | 0.255628  | 10 C           | -4.059442 | 1.001378  | 0.128521  |
| 11 C           | -3.938018 | -0.373637 | -0.292193 | 11 C           | -3.927985 | -0.381749 | -0.283608 |
| 12 C           | -2.826487 | -1.106133 | -0.105115 | 12 C           | -2.823054 | -1.119662 | -0.029471 |
| 13 C           | -1.621048 | -0.717034 | 0.719829  | 13 C           | -1.621388 | -0.708613 | 0.775444  |
| 14 O           | -1.226861 | -1.512804 | 1.546813  | 14 O           | -1.207729 | -1.482650 | 1.612700  |
| 15 C           | -1.649466 | 1.737300  | 0.090656  | 15 C           | -1.628780 | 1.706081  | 0.172635  |
| 16 C           | -3.081180 | 1.853713  | 0.422232  | 16 C           | -3.053509 | 1.880065  | 0.314594  |
| 17 O           | -1.102808 | 2.801718  | -0.252736 | 17 O           | -1.024939 | 2.843641  | -0.060584 |
| 18 Cl          | -2.666102 | -2.681005 | -0.778888 | 18 Cl          | -2.722685 | -2.756263 | -0.547448 |
| 19 Cl          | -5.260031 | -0.986869 | -1.216495 | 19 Cl          | -5.259195 | -1.080153 | -1.131000 |
| 20 Cl          | -5.679732 | 1.461429  | 0.707032  | 20 Cl          | -5.668564 | 1.602116  | 0.365924  |
| 21 H           | 0.520277  | 2.459090  | -0.388976 | 21 H           | -0.003660 | 2.631397  | -0.116362 |
| 22 C           | 1.562251  | -0.534793 | 0.507250  | 22 C           | 1.572748  | -0.568216 | 0.479452  |
| 23 C           | 1.288335  | -1.802797 | -0.315092 | 23 C           | 1.254213  | -1.763236 | -0.429965 |
| 24 H           | 1.174077  | -1.560648 | -1.374884 | 24 H           | 1.127402  | -1.440472 | -1.466863 |
| 25 H           | 2.124108  | -2.498028 | -0.224136 | 25 H           | 2.071905  | -2.485731 | -0.407442 |
| 26 H           | 0.391642  | -2.313645 | 0.032686  | 26 H           | 0.350261  | -2.277994 | -0.104318 |
| 27 C           | 1.677686  | -0.818164 | 2.019783  | 27 C           | 1.728202  | -0.972892 | 1.961057  |
| 28 H           | 2.539811  | -1.462043 | 2.205758  | 28 H           | 2.593101  | -1.630484 | 2.071636  |
| 29 H           | 1.834413  | 0.112262  | 2.572751  | 29 H           | 1.903759  | -0.089176 | 2.580969  |
| 30 H           | 0.774513  | -1.302289 | 2.385794  | 30 H           | 0.836022  | -1.482619 | 2.317810  |
| 31 C           | 4.647267  | -1.504856 | 0.371821  | 31 C           | 4.643940  | -1.547628 | 0.187012  |
| 32 C           | 6.497694  | 0.373285  | -0.541109 | 32 C           | 6.486722  | 0.397916  | -0.588945 |
| 33 C           | 5.978619  | -1.823071 | 0.287273  | 33 C           | 5.971136  | -1.864131 | 0.046395  |
| 34 C           | 6.916650  | -0.879242 | -0.175790 | 34 C           | 6.904727  | -0.885320 | -0.347579 |
| 35 H           | 7.966242  | -1.145707 | -0.238533 | 35 H           | 7.951328  | -1.149336 | -0.456120 |
| 36 H           | 3.950897  | -2.249349 | 0.736101  | 36 H           | 3.948272  | -2.318288 | 0.494217  |
| 37 H           | 6.313352  | -2.812431 | 0.581548  | 37 H           | 6.305715  | -2.877941 | 0.240815  |
| 38 H           | 7.212813  | 1.109794  | -0.895640 | 38 H           | 7.200001  | 1.159678  | -0.889909 |
| 39 H           | 5.471474  | 2.747567  | -1.179765 | 39 H           | 5.462466  | 2.826177  | -0.988880 |
| 40 H           | 3.085582  | 3.423749  | -1.048799 | 40 H           | 3.077005  | 3.492076  | -0.752420 |
| 41 H           | -3.337219 | 2.843792  | 0.784215  | 41 H           | -3.327318 | 2.905075  | 0.540088  |

**Table S4:** Optimized structure (Cartesian coordinates, Å) of **7b** isomers calculated by the PBE0/6-311+ G(d,p) method in the gas phase.

| <b>7b (NH)</b> |           |           |           | <b>7b (OH)</b> |           |           |           |
|----------------|-----------|-----------|-----------|----------------|-----------|-----------|-----------|
|                | X         | Y         | Z         |                | X         | Y         | Z         |
| 1 C            | 5.069078  | -1.474948 | -0.117822 | 1 C            | 5.063888  | -1.488305 | -0.242906 |
| 2 C            | 5.172173  | -0.072351 | -0.301359 | 2 C            | 5.167685  | -0.076451 | -0.338218 |
| 3 C            | 4.006758  | 0.748304  | -0.212961 | 3 C            | 4.003997  | 0.735917  | -0.184662 |
| 4 C            | 2.799115  | 0.071939  | 0.057713  | 4 C            | 2.789751  | 0.052484  | 0.056370  |
| 5 C            | 2.712335  | -1.285340 | 0.236668  | 5 C            | 2.713423  | -1.318793 | 0.147305  |
| 6 C            | 3.863366  | -2.079654 | 0.151603  | 6 C            | 3.860578  | -2.109113 | 0.001546  |
| 7 C            | 0.586682  | -0.297093 | 0.427993  | 7 C            | 0.638190  | -0.310979 | 0.418974  |
| 8 N            | 1.525187  | 0.619493  | 0.183885  | 8 N            | 1.531752  | 0.627650  | 0.218511  |
| 9 C            | -0.774216 | 0.077286  | 0.466980  | 9 C            | -0.762111 | 0.076278  | 0.471670  |
| 10 C           | -3.657207 | 1.431663  | 0.346529  | 10 C           | -3.612213 | 1.487486  | 0.253905  |
| 11 C           | -3.866099 | 0.178915  | -0.370198 | 11 C           | -3.871211 | 0.185370  | -0.327083 |
| 12 C           | -3.022905 | -0.861707 | -0.249053 | 12 C           | -3.040001 | -0.870120 | -0.165249 |
| 13 C           | -1.812614 | -0.938449 | 0.651948  | 13 C           | -1.804326 | -0.931117 | 0.688290  |
| 14 O           | -1.702970 | -1.913991 | 1.365325  | 14 O           | -1.661112 | -1.893252 | 1.413021  |
| 15 C           | -1.108451 | 1.484635  | 0.377329  | 15 C           | -1.086908 | 1.438012  | 0.402098  |
| 16 C           | -2.470188 | 1.967398  | 0.664635  | 16 C           | -2.403181 | 2.005653  | 0.552976  |
| 17 O           | -0.256704 | 2.378678  | 0.213775  | 17 O           | -0.165064 | 2.364255  | 0.320016  |
| 18 Cl          | -3.274455 | -2.324919 | -1.117887 | 18 Cl          | -3.400264 | -2.388924 | -0.886130 |
| 19 Cl          | -5.242930 | 0.086408  | -1.406686 | 19 Cl          | -5.313269 | 0.014471  | -1.259661 |
| 20 Cl          | -5.086688 | 2.307471  | 0.802867  | 20 Cl          | -4.985852 | 2.501582  | 0.556336  |
| 21 H           | 1.202459  | 1.596970  | 0.086023  | 21 H           | 0.748813  | 1.864610  | 0.245897  |
| 22 H           | 3.808468  | -3.154491 | 0.292568  | 22 H           | 3.807025  | -3.191085 | 0.075020  |
| 23 H           | 5.972106  | -2.072416 | -0.193939 | 23 H           | 5.965449  | -2.080431 | -0.367362 |
| 24 C           | 1.281611  | -1.660067 | 0.561672  | 24 C           | 1.288925  | -1.701209 | 0.466757  |
| 25 C           | 0.743941  | -2.713171 | -0.414900 | 25 C           | 0.712687  | -2.677250 | -0.565551 |
| 26 H           | 0.755993  | -2.341043 | -1.442474 | 26 H           | 0.710048  | -2.238215 | -1.566777 |
| 27 H           | 1.385161  | -3.597810 | -0.370399 | 27 H           | 1.333866  | -3.576866 | -0.595784 |
| 28 H           | -0.268487 | -3.021263 | -0.156309 | 28 H           | -0.301120 | -2.982655 | -0.305631 |
| 29 C           | 1.240905  | -2.164494 | 2.018857  | 29 C           | 1.273760  | -2.303531 | 1.887093  |
| 30 H           | 1.881316  | -3.047154 | 2.102077  | 30 H           | 1.903963  | -3.197601 | 1.896569  |
| 31 H           | 1.625998  | -1.404457 | 2.704233  | 31 H           | 1.685198  | -1.595602 | 2.611827  |
| 32 H           | 0.223515  | -2.424481 | 2.304738  | 32 H           | 0.261756  | -2.570855 | 2.183450  |
| 33 H           | -2.465958 | 2.940200  | 1.144685  | 33 H           | -2.377392 | 3.032453  | 0.901523  |
| 34 C           | 6.412010  | 0.553939  | -0.572951 | 34 C           | 6.406360  | 0.562892  | -0.583582 |
| 35 C           | 4.116409  | 2.145419  | -0.393660 | 35 C           | 4.114671  | 2.140384  | -0.278322 |
| 36 C           | 6.494212  | 1.911919  | -0.744338 | 36 C           | 6.488839  | 1.929162  | -0.669984 |
| 37 C           | 5.337489  | 2.713930  | -0.653507 | 37 C           | 5.333797  | 2.723896  | -0.515784 |
| 38 H           | 3.231852  | 2.770971  | -0.325200 | 38 H           | 3.225794  | 2.750474  | -0.159709 |
| 39 H           | 5.415755  | 3.787203  | -0.790502 | 39 H           | 5.412547  | 3.803780  | -0.586218 |
| 40 H           | 7.302900  | -0.062970 | -0.642650 | 40 H           | 7.295335  | -0.049533 | -0.702101 |
| 41 H           | 7.452807  | 2.376070  | -0.950903 | 41 H           | 7.445815  | 2.404781  | -0.857687 |

**Table S5:** Optimized structure (Cartesian coordinates, Å) of **8a** isomers calculated by the PBE0/6-311+ G(d,p) method in the gas phase.

| <b>8a (NH)</b> |           |           |           | <b>8a (OH)</b> |           |           |           |
|----------------|-----------|-----------|-----------|----------------|-----------|-----------|-----------|
|                | X         | Y         | Z         |                | X         | Y         | Z         |
| 1 C            | 5.332975  | 0.752213  | -0.546963 | 1 C            | 5.300700  | 0.817420  | -0.556830 |
| 2 C            | 4.842979  | 1.901251  | -1.217696 | 2 C            | 4.785989  | 2.035240  | -1.073183 |
| 3 C            | 3.502872  | 2.175061  | -1.286602 | 3 C            | 3.446309  | 2.313655  | -1.048316 |
| 4 C            | 2.634001  | 1.264084  | -0.667694 | 4 C            | 2.591684  | 1.344402  | -0.495284 |
| 5 C            | 3.044057  | 0.132274  | -0.005993 | 5 C            | 3.037183  | 0.144729  | 0.017160  |
| 6 C            | 4.425002  | -0.161516 | 0.083420  | 6 C            | 4.418242  | -0.159306 | 0.011947  |
| 7 C            | 0.687761  | 0.322596  | 0.033163  | 7 C            | 0.720495  | 0.366890  | 0.163822  |
| 8 N            | 1.244183  | 1.339602  | -0.624127 | 8 N            | 1.205392  | 1.445899  | -0.396315 |
| 9 C            | -0.714679 | 0.218519  | 0.141803  | 9 C            | -0.723207 | 0.251692  | 0.283875  |
| 10 C           | -3.886301 | 0.508713  | 0.158329  | 10 C           | -3.871996 | 0.481804  | 0.050361  |
| 11 C           | -3.656594 | -0.830720 | -0.377008 | 11 C           | -3.585153 | -0.872629 | -0.398285 |
| 12 C           | -2.520203 | -1.499530 | -0.139081 | 12 C           | -2.459836 | -1.530376 | -0.062036 |
| 13 C           | -1.357666 | -0.984103 | 0.681037  | 13 C           | -1.349132 | -0.979239 | 0.788354  |
| 14 O           | -0.951507 | -1.662028 | 1.599051  | 14 O           | -0.933855 | -1.634002 | 1.716932  |
| 15 C           | -1.520206 | 1.337135  | -0.306607 | 15 C           | -1.502897 | 1.358175  | -0.073204 |
| 16 C           | -2.932541 | 1.456927  | 0.203011  | 16 C           | -2.945610 | 1.460937  | 0.194692  |
| 17 O           | -1.075673 | 2.300755  | -0.933857 | 17 O           | -0.976837 | 2.451646  | -0.530180 |
| 18 Cl          | -2.225933 | -3.068753 | -0.776229 | 18 Cl          | -2.166566 | -3.145032 | -0.569878 |
| 19 Cl          | -4.919306 | -1.513759 | -1.335890 | 19 Cl          | -4.786930 | -1.640298 | -1.371466 |
| 20 Cl          | -5.476222 | 0.818516  | 0.755019  | 20 Cl          | -5.526245 | 0.811888  | 0.408368  |
| 21 H           | 0.625892  | 2.054577  | -1.026464 | 21 H           | 0.070892  | 2.270412  | -0.603916 |
| 22 C           | 1.818520  | -0.583212 | 0.543903  | 22 C           | 1.835953  | -0.612649 | 0.550108  |
| 23 C           | 1.690765  | -2.004126 | -0.028925 | 23 C           | 1.654005  | -1.975173 | -0.135213 |
| 24 H           | 1.604926  | -1.975551 | -1.118308 | 24 H           | 1.515351  | -1.853808 | -1.212956 |
| 25 H           | 2.581268  | -2.585014 | 0.215782  | 25 H           | 2.541440  | -2.592416 | 0.014545  |
| 26 H           | 0.827028  | -2.523211 | 0.383786  | 26 H           | 0.800759  | -2.515177 | 0.274703  |
| 27 C           | 1.855472  | -0.559523 | 2.085042  | 27 C           | 1.953504  | -0.729589 | 2.083802  |
| 28 H           | 2.736113  | -1.097765 | 2.441194  | 28 H           | 2.849118  | -1.299139 | 2.340788  |
| 29 H           | 1.925806  | 0.468878  | 2.450094  | 29 H           | 2.050837  | 0.261508  | 2.535653  |
| 30 H           | 0.959539  | -1.024112 | 2.492911  | 30 H           | 1.078998  | -1.225603 | 2.500649  |
| 31 C           | 4.969534  | -1.288081 | 0.751420  | 31 C           | 4.985364  | -1.353506 | 0.526854  |
| 32 C           | 6.722683  | 0.495064  | -0.486903 | 32 C           | 6.689205  | 0.552130  | -0.591553 |
| 33 C           | 6.323552  | -1.502490 | 0.790140  | 33 C           | 6.338233  | -1.573993 | 0.477504  |
| 34 C           | 7.212853  | -0.606106 | 0.164802  | 34 C           | 7.201920  | -0.615515 | -0.088476 |
| 35 H           | 8.281259  | -0.789341 | 0.203058  | 35 H           | 8.269810  | -0.803341 | -0.122076 |
| 36 H           | 4.310705  | -1.992123 | 1.243689  | 36 H           | 4.344941  | -2.105682 | 0.970558  |
| 37 H           | 6.714360  | -2.371820 | 1.308766  | 37 H           | 6.747770  | -2.495230 | 0.878935  |
| 38 Cl          | -3.260392 | 3.014654  | 0.855062  | 38 Cl          | -3.427753 | 3.035364  | 0.703884  |
| 39 H           | 7.399587  | 1.193651  | -0.969817 | 39 H           | 7.348086  | 1.298085  | -1.026279 |
| 40 H           | 5.558608  | 2.572475  | -1.681901 | 40 H           | 5.484860  | 2.752059  | -1.493184 |
| 41 H           | 3.125571  | 3.054558  | -1.796399 | 41 H           | 3.046583  | 3.242620  | -1.439260 |

**Table S6:** Optimized structure (Cartesian coordinates, Å) of **8b** isomers calculated by the PBE0/6-311+ G(d,p) method in the gas phase.

| <b>8b (NH)</b> |           |           |           | <b>8b (OH)</b> |           |           |           |
|----------------|-----------|-----------|-----------|----------------|-----------|-----------|-----------|
|                | X         | Y         | Z         |                | X         | Y         | Z         |
| 1 C            | 5.332260  | -1.353617 | 0.283868  | 1 C            | 5.313482  | -1.400233 | 0.041366  |
| 2 C            | 5.349437  | -0.028216 | -0.220110 | 2 C            | 5.317864  | -0.026927 | -0.315025 |
| 3 C            | 4.127323  | 0.694752  | -0.374001 | 3 C            | 4.094872  | 0.708807  | -0.331875 |
| 4 C            | 2.956206  | 0.005097  | 0.001646  | 4 C            | 2.928597  | -0.008888 | 0.017627  |
| 5 C            | 2.951440  | -1.276854 | 0.488598  | 5 C            | 2.946905  | -1.341248 | 0.361602  |
| 6 C            | 4.157115  | -1.975421 | 0.636469  | 6 C            | 4.151824  | -2.055520 | 0.379850  |
| 7 C            | 0.756095  | -0.439513 | 0.372305  | 7 C            | 0.798349  | -0.461410 | 0.416680  |
| 8 N            | 1.641547  | 0.464256  | -0.053613 | 8 N            | 1.627445  | 0.488497  | 0.056534  |
| 9 C            | -0.624992 | -0.161252 | 0.342029  | 9 C            | -0.620989 | -0.159156 | 0.433622  |
| 10 C           | -3.586855 | 0.975609  | 0.110609  | 10 C           | -3.536769 | 1.006261  | 0.047565  |
| 11 C           | -3.639617 | -0.298981 | -0.601237 | 11 C           | -3.602152 | -0.312620 | -0.564234 |
| 12 C           | -2.756630 | -1.279062 | -0.364862 | 12 C           | -2.746001 | -1.306804 | -0.260232 |
| 13 C           | -1.614307 | -1.206553 | 0.623527  | 13 C           | -1.607551 | -1.211145 | 0.715573  |
| 14 O           | -1.506051 | -2.082332 | 1.453315  | 14 O           | -1.470379 | -2.072376 | 1.554458  |
| 15 C           | -1.047792 | 1.185264  | 0.014396  | 15 C           | -1.017396 | 1.162558  | 0.196775  |
| 16 C           | -2.438402 | 1.618081  | 0.393979  | 16 C           | -2.391155 | 1.650454  | 0.382263  |
| 17 O           | -0.286636 | 2.065335  | -0.395158 | 17 O           | -0.157293 | 2.099131  | -0.058486 |
| 18 Cl          | -2.803450 | -2.779134 | -1.203046 | 18 Cl          | -2.881998 | -2.866289 | -0.967890 |
| 19 Cl          | -4.899673 | -0.487421 | -1.766295 | 19 Cl          | -4.876016 | -0.578905 | -1.699026 |
| 20 Cl          | -5.110193 | 1.629390  | 0.592434  | 20 Cl          | -5.057218 | 1.764418  | 0.342824  |
| 21 H           | 1.280610  | 1.370025  | -0.377066 | 21 H           | 0.797396  | 1.623896  | -0.090823 |
| 22 H           | 4.168174  | -2.990315 | 1.021074  | 22 H           | 4.174800  | -3.106261 | 0.652210  |
| 23 H           | 6.277110  | -1.877674 | 0.387722  | 23 H           | 6.258608  | -1.934635 | 0.042926  |
| 24 C           | 1.531471  | -1.687432 | 0.816936  | 24 C           | 1.542638  | -1.768399 | 0.715623  |
| 25 C           | 1.133590  | -2.949279 | 0.038444  | 25 C           | 1.076335  | -2.948097 | -0.146464 |
| 26 H           | 1.197374  | -2.783257 | -1.039971 | 26 H           | 1.079980  | -2.688219 | -1.208359 |
| 27 H           | 1.826728  | -3.754824 | 0.295801  | 27 H           | 1.762543  | -3.787754 | -0.004688 |
| 28 H           | 0.127137  | -3.279039 | 0.292924  | 28 H           | 0.078508  | -3.283222 | 0.137032  |
| 29 C           | 1.415030  | -1.898161 | 2.338826  | 29 C           | 1.505196  | -2.115676 | 2.217713  |
| 30 H           | 2.094162  | -2.702465 | 2.635534  | 30 H           | 2.188483  | -2.949112 | 2.403883  |
| 31 H           | 1.707199  | -0.994410 | 2.880421  | 31 H           | 1.838999  | -1.266696 | 2.820490  |
| 32 H           | 0.395550  | -2.167787 | 2.609621  | 32 H           | 0.500036  | -2.399485 | 2.524411  |
| 33 C           | 6.556916  | 0.614675  | -0.583587 | 33 C           | 6.512851  | 0.648470  | -0.660680 |
| 34 C           | 4.151260  | 2.015030  | -0.877085 | 34 C           | 4.104623  | 2.075336  | -0.686887 |
| 35 C           | 6.555383  | 1.896335  | -1.070555 | 35 C           | 6.497260  | 1.976593  | -1.002253 |
| 36 C           | 5.343094  | 2.602127  | -1.218209 | 36 C           | 5.283776  | 2.695484  | -1.015216 |
| 37 H           | 3.224387  | 2.568161  | -0.993131 | 37 H           | 3.171039  | 2.627407  | -0.696754 |
| 38 H           | 5.355182  | 3.616034  | -1.603676 | 38 H           | 5.285490  | 3.745728  | -1.287577 |
| 39 H           | 7.490419  | 0.071821  | -0.469842 | 39 H           | 7.447131  | 0.094934  | -0.650608 |
| 40 H           | 7.489917  | 2.374261  | -1.344683 | 40 H           | 7.421596  | 2.480581  | -1.264544 |
| 41 Cl          | -2.447356 | 3.114805  | 1.241813  | 41 Cl          | -2.460693 | 3.231499  | 1.065182  |
